# Supplementary material for: Health expectancy in the occupied Palestinian territory: estimates from the Gaza Strip and the West Bank: based on surveys from 2006 to 2010
Source: PubMed Central journal article supplement — BMJ Open. 2012 Nov 9;2(6):e001572. doi: 10.1136/bmjopen-2012-001572 (PMC3532998; doi:10.1136/bmjopen-2012-001572), 2012-11-09
Supplement: bmjopen-2012-001572.draft_revisions.pdf [file bmjopen-2012-001572.draft_revisions.pdf]

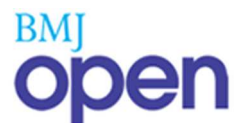

**Health expectancy in the occupied Palestinian territory:  
estimates from the Gaza Strip and the West Bank - based on  
surveys from 2006 and 2010**

|                                 |                                                                                                                                                                                                   |
|---------------------------------|---------------------------------------------------------------------------------------------------------------------------------------------------------------------------------------------------|
| Journal:                        | <i>BMJ Open</i>                                                                                                                                                                                   |
| Manuscript ID:                  | bmjopen-2012-001572                                                                                                                                                                               |
| Article Type:                   | Research                                                                                                                                                                                          |
| Date Submitted by the Author:   | 30-May-2012                                                                                                                                                                                       |
| Complete List of Authors:       | Qlalweh, Khaled; Palestinian Central Bureau of Statistics, Duraidi, Mohammed; Palestinian Central Bureau of Statistics, Brønnum-Hansen, Henrik; Copenhagen University, Institute of Public Health |
| <b>Primary Subject Heading</b>: | Public health                                                                                                                                                                                     |
| Secondary Subject Heading:      | Epidemiology                                                                                                                                                                                      |
| Keywords:                       | EPIDEMIOLGY, PUBLIC HEALTH, Health expectancy                                                                                                                                                     |
|                                 |                                                                                                                                                                                                   |

SCHOLARONE™  
Manuscripts

30 May 2012

Word count, main text: 2537

Word count, abstract: 240

**Health expectancy in the occupied Palestinian territory: estimates from the Gaza Strip and the West Bank – based on surveys from 2006 and 2010**

Khaled Qlalweh, Mohammed Duraidi, Henrik Brønnum-Hansen

Palestinian Central Bureau of Statistics, Ramallah, Palestine Khaled Qlalweh Director of Health Statistics

Palestinian Central Bureau of Statistics, Ramallah, Palestine Mohammed Duraidi Director of Demographic and Population Statistics

National Institute of Public Health, University of Southern Denmark, Øster Farimagsgade 5, 1353 Copenhagen, Denmark Henrik Brønnum-Hansen

Faculty of Health Sciences, Department of Public Health, University of Copenhagen, Øster Farimagsgade 5, 1014 Copenhagen, Denmark Henrik Brønnum-Hansen postdoc

**Corresponding author** Henrik Brønnum-Hansen, Faculty of Health Sciences, Department of Public Health, University of Copenhagen, Øster Farimagsgade 5, 1014 Copenhagen, Denmark Telephone: +45 35 32 79 74 E-mail: Henrik.Bronnum-Hansen@sund.ku.dk**Conflicts of interest** We declare that we have no conflicts of interest. We had no support from any organisation for the submitted work and no financial relationships with any organisations that might have an interest in the submitted work in the previous three years, no other relationships or activities that could appear to have influenced the submitted work. We declare that no ethical approval was required for the study.**Contributors** KQ and HBH initiated the study. KQ and MD provided life tables and health status prevalence tables. HBH undertook the analysis. All authors have contributed to the writing of the manuscript and have seen and approved the final version.**Acknowledgements** This study was supported by a grant at University of Southern Denmark for establishing international research collaboration (HBH).

Results for 2006 were presented at the 23rd Annual Meeting of REVES, International Network on Health Expectancy, 25-27 May 2011, Paris, France. Travelling expenses for KQ were covered by a grant supporting the REVES meeting.

**Abstract**

**Objectives** The purpose of the study was to estimate health expectancy for the Palestinian population.

**Design** Mortality data and population-based health surveys.

**Setting** The Israeli-occupied Palestinian territory of the Gaza Strip and the West Bank.

**Participants** 17 034 and 38 071 adults aged 20 or over participating the Palestinian Family Health Surveys of 2006 and 2010. Mortality rates for 2007 and 2010 covered the entire population.

**Outcome measures** Life expectancy and expected lifetime with and without chronic disease were estimated using the Sullivan method on the basis of mortality data and data on the prevalence of chronic disease.

**Results** Life expectancy at the age of 20 increased from 52.8 years in 2006 to 53.3 years in 2010 for men and from 55.1 years to 55.7 years for women. In 2006, expected lifetime without a chronic disease was 37.7 (95% CI: 37.0 to 38.3) years and 32.5 (95% CI: 31.9 to 33.2) years for 20-year-old men and women respectively. By 2010, this had decreased by 1.6 years for men and increased by 1.3 years for women. The health status of men has worsened. In particular, lifetime with hypertension and diabetes has increased. For women, the gain in life expectancy consisted partly of years with and partly of years without the most prevalent diseases.

**Conclusions** Health expectancy for men and women diverged, which could to some extent be due to gender-specific exposures related to lifestyle factors and the impact of military occupation.

**Keywords** health expectancy, life expectancy, occupied Palestinian territory

## Introduction

The number of Palestinians worldwide recently reached 11 million. Fewer than half (4.2 million) live in the occupied Palestinian territory. Of these, two million are refugees, the majority living in camps.<sup>1</sup> As only 1.3 million Palestinians live in Israel, 5.5 million of the Palestinian population lives abroad. The total area of historical Palestine is 27 000 square kilometres. Six percent of this was controlled by Jewish immigrants prior to the United Nations resolution on the partition of Palestine in 1947. Today, Israel controls 85% of the total area of historical Palestine. The Gaza Strip is one of the most densely populated parts of the World, with about 4300 individuals per square kilometre.<sup>2,3</sup> Ever since the state of Israel's establishment in 1948, Palestinians have lived under war conditions, under occupation, or under displacement from their native homes. More than half of the population lives in exile outside of Palestine, and the remaining 4.2 million Palestinians reside in an area of land that has shrunk markedly and is being continuously and systematically eroded by illegal Israeli settlements. Continued land confiscation and intensified tightening of the closure system has increased the prevalence of economic crises, unemployment, and poverty, thereby strengthening dependency on donor financing.<sup>4</sup> Restrictions on freedom of movement, trading, employment, living a healthy life, access to health care, *etc.* threaten welfare and public health.<sup>5-7</sup>

In 2010, the share of the population under the age of 20 in the occupied Palestinian territory was 53.3%, with 4.4% of the population being aged 60 years or older.<sup>8</sup> According to WHO EMRO, the crude birth rate was 29.6 births per 1000 persons in 2009, and the crude death rate was 3.0 deaths per 1000 persons.<sup>9</sup> Life expectancy at birth was 70.5 years for men and 73.2 for women.<sup>9</sup> The neonatal mortality rate (deaths per 1000 live births during the first 28 days of life) was 9.4, the infant mortality rate was 25.0 deaths per 1000 live births, and the total

1  
2  
3 fertility rate was 4.6 births per woman.<sup>9</sup> The maternal mortality rate was 38 per 10 000 live  
4  
5 births.<sup>9</sup> There have been only very modest improvements in infant and child mortality rates  
6  
7 since the 1990s.<sup>10</sup> The three leading causes of death are heart disease (21.0% of all deaths),  
8  
9 cerebrovascular disease (11.0%), and cancer (10.3%).<sup>11</sup>  
10  
11

12  
13  
14 Health expectancy represents the average lifetime a person can expect to live in a specific  
15  
16 state of health (*e.g.* with or without chronic disease). As a summary measure of population  
17  
18 health that combines health status and mortality, health expectancy has the strength of  
19  
20 offering a more nuanced contribution to the monitoring of population health than do  
21  
22 measurements of life expectancy. Health expectancy can be measured in various ways and for  
23  
24 different population groups, *i.e.* based on a geographical area, a social group, or a group with  
25  
26 other characteristics. The purpose of this study was to estimate expected lifetime with or  
27  
28 without chronic disease among Palestinians living in the Gaza Strip and the West Bank and to  
29  
30 evaluate changes that have taken place over the past five years.  
31  
32  
33  
34  
35

### 36 **Methods**

37  
38  
39 Health prevalence data was derived from the Palestinian Family Health Surveys carried out in  
40  
41 2006 and 2010.<sup>8 12</sup> The surveys were designed to be representative of the entire Palestinian  
42  
43 population of the occupied Palestinian territory (*i.e.* the Gaza Strip and the West Bank,  
44  
45 including East Jerusalem). The half million Israelis living in illegal settlements on the West  
46  
47 Bank and the more than five million exiled Palestinians were not represented in this study.  
48  
49  
50

51  
52  
53 For each survey, a stratified two-stage random sample was drawn from lists of all Palestinian  
54  
55 households. First, enumeration areas were selected from the Palestinian territories, then a  
56  
57 random sample of households was drawn from each enumeration area in the West Bank and  
58  
59  
60

1  
2  
3 the Gaza Strip. The surveys consisted of 13 238 households in 2006 and 15 355 households in  
4  
5 2010. The household response rates were 88.0% in 2006 and 89.4% in 2010. The present  
6  
7 study included adults aged 20 or above from the two surveys: 17 034 and 38 071 participants  
8  
9 respectively. Information on household members' socio-economic and demographic  
10  
11 characteristics was provided by the head of household or another mature person. Data for all  
12  
13 members was collected by self-reported responses or by proxy. Age was assessed by asking  
14  
15 for the exact date of birth or any document with this information. Further details are available  
16  
17 in the survey reports.<sup>8 12</sup>  
18  
19

20  
21  
22  
23 Chronic disease was measured by answers to the question 'Does (name) have any disease  
24  
25 according to a medical diagnosis and receive treatment continuously?' Whenever disease was  
26  
27 reported, its nature was determined by choosing among 20 diseases. According to data from  
28  
29 the Palestinian Family Survey of 2010,<sup>8</sup> the four most frequently reported diseases were  
30  
31 hypertension, diabetes, rheumatic condition, and heart disease. The crude prevalence  
32  
33 proportions among adults (aged 20 and above) were 8.5%, 6.5%, 4.9%, and 2.7% respectively  
34  
35 in 2010.  
36  
37

38  
39  
40 Child and infant mortality rates at the age of 0–4 years were estimated on the basis of data  
41  
42 from the Palestinian Family Health Surveys, and abridged life tables were constructed using  
43  
44 MortPak, the UN demographic measurement software package.<sup>13</sup>  
45  
46  
47

48  
49 Health expectancy at the age of 20 was estimated using the Sullivan method<sup>14 15</sup> in which the  
50  
51 expected number of years lived in the age intervals of 20–24, 25–29, ..., 70–74, >75 years  
52  
53 were calculated on the basis of the life table figures and multiplied by age-specific  
54  
55 proportions of healthy people taken from the health survey data. Health expectancy for 20-  
56  
57  
58  
59  
60

1  
2  
3 year-olds was then calculated by adding these years for all age groups and dividing the sum  
4  
5 by the number of survivors at the age of 20. A measure of the portion of lifetime spent in  
6  
7 good health was obtained by dividing lifetime in a healthy state with life expectancy.  
8  
9 Furthermore, estimations were made of partial life expectancy, *i.e.* expected lifetime between  
10  
11 the ages of 20 and 60. Statistical tests were carried out using a Z-test.<sup>15</sup>  
12  
13

14  
15  
16 A technique for decomposing health expectancies based on the Sullivan method enables  
17  
18 comparisons over time of contributions to mortality differences and health differences.<sup>16</sup> A  
19  
20 change in age-specific mortality will change life expectancy because a greater or lesser  
21  
22 number of years lived affects not only the specific age group but also the years lived in future  
23  
24 older age groups. This change (the mortality effect) will increase or reduce expected lifetime  
25  
26 in different health states. A change in the proportion of healthy people represents the  
27  
28 decomposition's other component (the health effect).  
29  
30  
31  
32  
33

## 34 **Results**

35  
36 Life expectancy at the age of 20 was about half a year longer among men living in the West  
37  
38 Bank than it was in the Gaza Strip and increased by half a year from 2006 to 2010 (table 1).  
39  
40 For women, life expectancy increased by a little more than half a year, and the difference  
41  
42 between the West Bank and the Gaza Strip remained nearly one year (table 2). For 60 year  
43  
44 olds, life expectancy increased by 0.2 years in the West Bank and by 0.3 years in the Gaza  
45  
46 Strip.  
47  
48  
49  
50

51  
52 During this period, expected lifetime without chronic disease at the age of 20 decreased  
53  
54 statistically significantly by 1.6 years for men in the West Bank ( $p=0.02$ ) and statistically  
55  
56 insignificantly by 1.3 years in the Gaza Strip ( $p=0.17$ ) (table 1). Simultaneously, expected  
57  
58  
59  
60

lifetime with chronic disease among male Palestinians increased significantly by approximately 2 years ( $p < 0.001$ ). Partial life expectancy between the ages of 20 and 60 with chronic disease increased from 7.0 years in 2006 to 7.4 years in 2010 (table 1). Among 60-year-old men, expected lifetime with chronic disease increased by 1.7 years. The proportion of expected lifetime without chronic disease between the ages of 20 and 60 declined from 81.8% to 80.7% and from 43.9% to 34.7% for 60 years olds (table 1).

**Table 1 Life expectancy at age 20 and 60, partial life expectancy (age 20–60), and expected lifetime without and with chronic disease, and proportion of expected lifetime without chronic disease – Men, Palestine, 2006 and 2010**

|                                                      | Calendar year | Life expectancy years | Expected lifetime without chronic disease years (95% CI) | Expected lifetime with chronic disease years (95% CI) | Proportion of expected lifetime without chronic disease % (95% CI) |
|------------------------------------------------------|---------------|-----------------------|----------------------------------------------------------|-------------------------------------------------------|--------------------------------------------------------------------|
| <b>20-year-old men</b>                               |               |                       |                                                          |                                                       |                                                                    |
| Gaza Strip                                           | 2006          | 52.4                  | 37.8 (36.7 to 38.9)                                      | 14.6 (13.4 to 15.7)                                   | 72.2 (70.0 to 74.4)                                                |
|                                                      | 2010          | 52.9                  | 36.5 (35.7 to 37.2)                                      | 16.4 (15.7 to 17.2)                                   | 69.0 (67.5 to 70.4)                                                |
| West Bank                                            | 2006          | 52.9                  | 37.6 (36.8 to 38.4)                                      | 15.3 (14.5 to 16.1)                                   | 71.0 (69.5 to 72.5)                                                |
|                                                      | 2010          | 53.5                  | 36.0 (35.4 to 36.5)                                      | 17.5 (17.0 to 18.0)                                   | 67.3 (66.3 to 68.3)                                                |
| Palestinian Territory                                | 2006          | 52.8                  | 37.7 (37.0 to 38.3)                                      | 15.1 (14.4 to 15.7)                                   | 71.4 (70.2 to 72.7)                                                |
|                                                      | 2010          | 53.3                  | 36.1 (35.7 to 36.6)                                      | 17.1 (16.7 to 17.6)                                   | 67.8 (67.0 to 68.7)                                                |
| <b>60-year-old men</b>                               |               |                       |                                                          |                                                       |                                                                    |
| Gaza Strip                                           | 2006          | 16.9                  | 7.6 (6.5 to 8.7)                                         | 9.4 (8.3 to 10.5)                                     | 44.6 (38.1 to 51.2)                                                |
|                                                      | 2010          | 17.2                  | 6.1 (5.3 to 6.8)                                         | 11.1 (10.3 to 11.8)                                   | 35.4 (31.1 to 39.7)                                                |
| West Bank                                            | 2006          | 17.2                  | 7.5 (6.7 to 8.2)                                         | 9.7 (9.0 to 10.4)                                     | 43.5 (39.1 to 47.8)                                                |
|                                                      | 2010          | 17.4                  | 6.0 (5.5 to 6.5)                                         | 11.4 (10.9 to 11.9)                                   | 34.3 (31.5 to 37.2)                                                |
| Palestinian Territory                                | 2006          | 17.1                  | 7.5 (6.9 to 8.1)                                         | 9.6 (9.0 to 10.2)                                     | 43.9 (40.3 to 47.5)                                                |
|                                                      | 2010          | 17.3                  | 6.0 (5.6 to 6.4)                                         | 11.3 (10.9 to 11.7)                                   | 34.7 (32.3 to 37.0)                                                |
| <b>Partial life expectancy between age 20 and 60</b> |               |                       |                                                          |                                                       |                                                                    |
| <b>20-year-old men</b>                               |               |                       |                                                          |                                                       |                                                                    |
| Gaza Strip                                           | 2006          | 38.2                  | 31.5 (30.8 to 32.1)                                      | 6.7 (6.0 to 7.4)                                      | 82.4 (80.7 to 84.2)                                                |
|                                                      | 2010          | 38.3                  | 31.3 (30.9 to 31.8)                                      | 7.0 (6.6 to 7.4)                                      | 81.7 (80.6 to 82.9)                                                |
| West Bank                                            | 2006          | 38.3                  | 31.2 (30.8 to 31.7)                                      | 7.1 (6.6 to 7.6)                                      | 81.5 (80.3 to 82.8)                                                |
|                                                      | 2010          | 38.5                  | 30.8 (30.5 to 31.2)                                      | 7.7 (7.3 to 8.0)                                      | 80.1 (79.3 to 81.0)                                                |
| Palestinian Territory                                | 2006          | 38.3                  | 31.3 (30.9 to 31.7)                                      | 7.0 (6.6 to 7.3)                                      | 81.8 (80.8 to 82.8)                                                |
|                                                      | 2010          | 38.4                  | 31.0 (30.7 to 31.3)                                      | 7.4 (7.2 to 7.7)                                      | 80.7 (80.0 to 81.3)                                                |



1  
2  
3 For 20-year-old women living in the West Bank, expected lifetime without chronic disease  
4 increased statistically significantly by 1.6 years ( $p=0.02$ ) (table 2). The gain in disease-free  
5 life expectancy thus exceeded the increase in life expectancy. In the Gaza Strip, the gain of  
6  
7 0.7 years in life expectancy among 20-year-old women was evenly distributed, with 0.5 years  
8 without disease and 0.2 years with disease (table 2). For Palestinian women between ages of  
9  
10 20 and 60, expected years with chronic disease decreased from 10.6 to 9.1 during the period  
11 of 2006-2010 (table 2). The general gain in disease-free life expectancy did not, however,  
12  
13 favour elderly Palestinian women. Thus, among 60-year-old women, expected lifetime with  
14  
15 chronic disease increased by 0.8 years (table 2).  
16  
17  
18  
19  
20  
21  
22  
23  
24  
25  
26  
27  
28  
29  
30  
31  
32  
33  
34  
35  
36  
37  
38  
39  
40  
41  
42  
43  
44  
45  
46  
47  
48  
49  
50  
51  
52  
53  
54  
55  
56  
57  
58  
59  
60

**Table 2 Life expectancy at age 20 and 60, partial life expectancy (age 20–60), and expected lifetime without and with chronic disease, and proportion of expected lifetime without chronic disease – Women, Palestine, 2006 and 2010**

|                                                      | Calendar year | Life expectancy years | Expected lifetime without chronic disease years (95% CI) | Expected lifetime with chronic disease years (95% CI) | Proportion of expected lifetime without chronic disease % (95% CI) |
|------------------------------------------------------|---------------|-----------------------|----------------------------------------------------------|-------------------------------------------------------|--------------------------------------------------------------------|
| <b>20-year-old women</b>                             |               |                       |                                                          |                                                       |                                                                    |
| Gaza Strip                                           | 2006          | 54.5                  | 34.4 (33.3 to 35.5)                                      | 20.1 (19.0 to 21.2)                                   | 63.1 (61.1 to 65.2)                                                |
|                                                      | 2010          | 55.2                  | 34.9 (34.2 to 35.7)                                      | 20.3 (19.5 to 21.0)                                   | 63.2 (61.9 to 64.6)                                                |
| West Bank                                            | 2006          | 55.4                  | 31.6 (30.8 to 32.4)                                      | 23.8 (23.0 to 24.6)                                   | 57.1 (55.6 to 58.5)                                                |
|                                                      | 2010          | 56.0                  | 33.2 (32.7 to 33.7)                                      | 22.8 (22.2 to 23.3)                                   | 59.3 (58.4 to 60.2)                                                |
| Palestinian Territory                                | 2006          | 55.1                  | 32.5 (31.9 to 33.2)                                      | 22.5 (21.9 to 23.2)                                   | 59.1 (57.9 to 60.2)                                                |
|                                                      | 2010          | 55.7                  | 33.8 (33.3 to 34.2)                                      | 21.9 (21.5 to 22.4)                                   | 60.6 (59.9 to 61.4)                                                |
| <b>60-year-old women</b>                             |               |                       |                                                          |                                                       |                                                                    |
| Gaza Strip                                           | 2006          | 18.5                  | 5.7 (4.7 to 6.6)                                         | 12.8 (11.8 to 13.8)                                   | 30.6 (25.3 to 35.9)                                                |
|                                                      | 2010          | 18.8                  | 5.2 (4.6 to 5.9)                                         | 13.6 (12.9 to 14.2)                                   | 27.9 (24.4 to 31.4)                                                |
| West Bank                                            | 2006          | 18.9                  | 5.0 (4.3 to 5.6)                                         | 13.9 (13.3 to 14.6)                                   | 26.3 (22.9 to 29.7)                                                |
|                                                      | 2010          | 19.2                  | 4.4 (4.0 to 4.8)                                         | 14.8 (14.3 to 15.2)                                   | 22.9 (20.7 to 25.2)                                                |
| Palestinian Territory                                | 2006          | 18.8                  | 5.2 (4.6 to 5.7)                                         | 13.6 (13.0 to 14.1)                                   | 27.6 (24.7 to 30.5)                                                |
|                                                      | 2010          | 19.0                  | 4.7 (4.3 to 5.0)                                         | 14.4 (14.0 to 14.7)                                   | 24.5 (22.6 to 26.4)                                                |
| <b>Partial life expectancy between age 20 and 60</b> |               |                       |                                                          |                                                       |                                                                    |
| <b>20 year-old women</b>                             |               |                       |                                                          |                                                       |                                                                    |
| Gaza Strip                                           | 2006          | 38.4                  | 29.5 (28.8 to 30.2)                                      | 8.9 (8.2 to 9.7)                                      | 76.7 (74.9 to 78.6)                                                |
|                                                      | 2010          | 38.6                  | 30.3 (29.8 to 30.8)                                      | 8.3 (7.9 to 8.8)                                      | 78.4 (77.2 to 79.6)                                                |
| West Bank                                            | 2006          | 38.7                  | 27.2 (26.7 to 27.7)                                      | 11.5 (10.9 to 12.0)                                   | 70.4 (69.0 to 71.7)                                                |
|                                                      | 2010          | 38.8                  | 29.3 (28.9 to 29.6)                                      | 9.6 (9.2 to 9.9)                                      | 75.4 (74.5 to 76.3)                                                |
| Palestinian Territory                                | 2006          | 38.6                  | 28.0 (27.6 to 28.4)                                      | 10.6 (10.2 to 11.0)                                   | 72.5 (71.4 to 73.6)                                                |
|                                                      | 2010          | 38.7                  | 29.6 (29.3 to 29.9)                                      | 9.1 (8.9 to 9.4)                                      | 76.4 (75.7 to 77.1)                                                |

Figure 1 shows the results of decomposing into mortality and health effects the change over time in disease-free life expectancy at the age of 20. The mortality effect of approximately one fourth of a year was nearly equal for men and women and did not differ between the Gaza Strip and the West Bank. The divergent change from 2006 to 2010 between men and women in expected lifetime without chronic disease thus resulted from the health effect (*i.e.* prevalence of disease increased among men and decreased among women).

**Fig 1 Decomposition into the mortality and health effects of changes between 2006 and 2010 in disease-free life expectancy at age 20 in the occupied Palestinian territory**

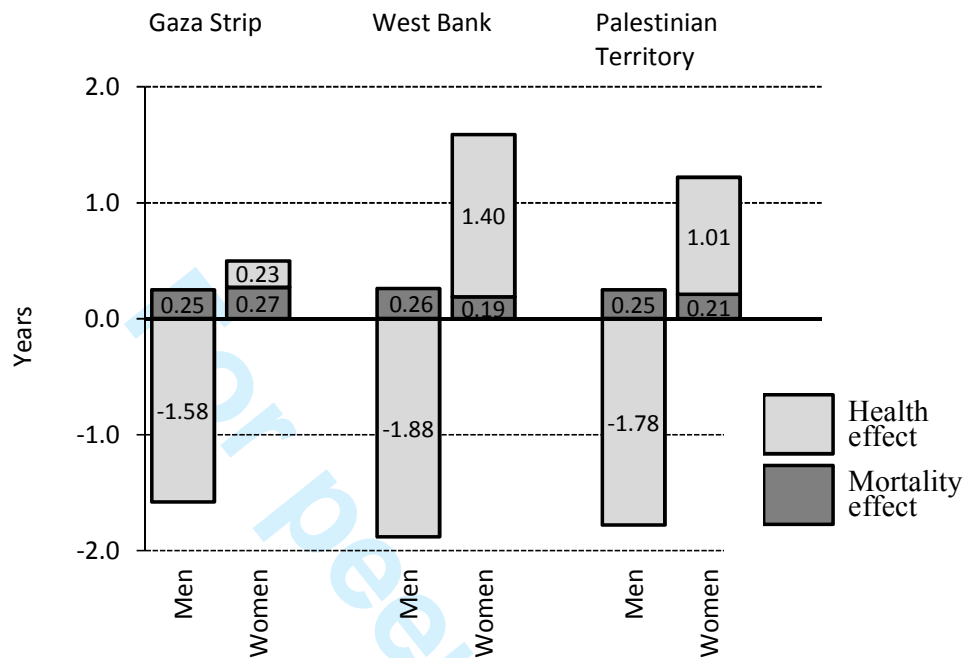

In 2010, 20-year-old men and women could expect 3.6 years (95% CI: 3.3 to 3.9) and 3.2 years (95% CI: 3.0 to 3.5) with heart disease respectively. For the three other most prevalent chronic conditions, women could expect a greater number of years with a disease than could men (12.5 versus 7.7 years with hypertension, 8.3 versus 6.7 years with diabetes, and 6.8 versus 3.6 years with rheumatic conditions) (table 3). No gain in disease-free life expectancy was observed for any of the four diseases, with the exception of heart disease among women. In particular, the health status of men worsened, and the gender gap decreased during the period of 2006 to 2010 (table 3, figure 2).

**Table 3 Life expectancy at age 20 and expected lifetime with the four most prevalent diseases – Palestine, 2006 and 2010**

|                          | Calendar year | Life expectancy years | Expected lifetime with Hypertension years (95% CI) | Diabetes years (95% CI) | Heart diseases years (95% CI) | Rheumatic conditions years (95% CI) |
|--------------------------|---------------|-----------------------|----------------------------------------------------|-------------------------|-------------------------------|-------------------------------------|
| <b>20-year-old men</b>   |               |                       |                                                    |                         |                               |                                     |
| Gaza Strip               | 2006          | 52.4                  | 6.0 (5.1 to 6.8)                                   | 4.6 (3.9 to 5.4)        | 2.4 (1.8 to 2.9)              | 2.1 (1.5 to 2.7)                    |
|                          | 2010          | 52.9                  | 7.9 (7.2 to 8.6)                                   | 6.7 (6.0 to 7.4)        | 3.3 (2.8 to 3.8)              | 3.4 (2.9 to 4.0)                    |
| West Bank                | 2006          | 52.9                  | 5.5 (4.9 to 6.1)                                   | 5.4 (4.8 to 6.0)        | 2.9 (2.4 to 3.3)              | 2.5 (2.1 to 3.0)                    |
|                          | 2010          | 53.5                  | 7.6 (7.2 to 8.1)                                   | 6.8 (6.3 to 7.2)        | 3.7 (3.3 to 4.1)              | 3.7 (3.3 to 4.0)                    |
| Palestinian Territory    | 2006          | 52.8                  | 5.7 (5.2 to 6.2)                                   | 5.1 (4.7 to 5.6)        | 2.7 (2.4 to 3.1)              | 2.4 (2.0 to 2.7)                    |
|                          | 2010          | 53.3                  | 7.7 (7.3 to 8.1)                                   | 6.7 (6.3 to 7.1)        | 3.6 (3.3 to 3.9)              | 3.6 (3.3 to 3.9)                    |
| <b>20-year-old women</b> |               |                       |                                                    |                         |                               |                                     |
| Gaza Strip               | 2006          | 54.5                  | 11.8 (10.8 to 12.8)                                | 7.9 (7.0 to 8.8)        | 2.4 (1.8 to 3.0)              | 4.1 (3.4 to 4.8)                    |
|                          | 2010          | 55.2                  | 12.5 (11.7 to 13.2)                                | 8.1 (7.4 to 8.7)        | 2.7 (2.3 to 3.2)              | 5.0 (4.4 to 5.6)                    |
| West Bank                | 2006          | 55.4                  | 10.9 (10.2 to 11.7)                                | 7.5 (6.9 to 8.2)        | 3.5 (3.0 to 4.0)              | 7.6 (7.0 to 8.3)                    |
|                          | 2010          | 56.0                  | 12.4 (11.9 to 13.0)                                | 8.4 (7.9 to 8.8)        | 3.5 (3.1 to 3.9)              | 7.8 (7.3 to 8.2)                    |
| Palestinian Territory    | 2006          | 55.1                  | 11.2 (10.6 to 11.8)                                | 7.6 (7.1 to 8.1)        | 3.1 (2.7 to 3.5)              | 6.4 (5.9 to 6.9)                    |
|                          | 2010          | 55.7                  | 12.5 (12.0 to 12.9)                                | 8.3 (7.9 to 8.7)        | 3.2 (3.0 to 3.5)              | 6.8 (6.5 to 7.2)                    |

**Fig 2 Change between 2006 and 2010 in life expectancy and expected lifetime at age 20 with the four most frequent chronic diseases in the occupied Palestinian territories**

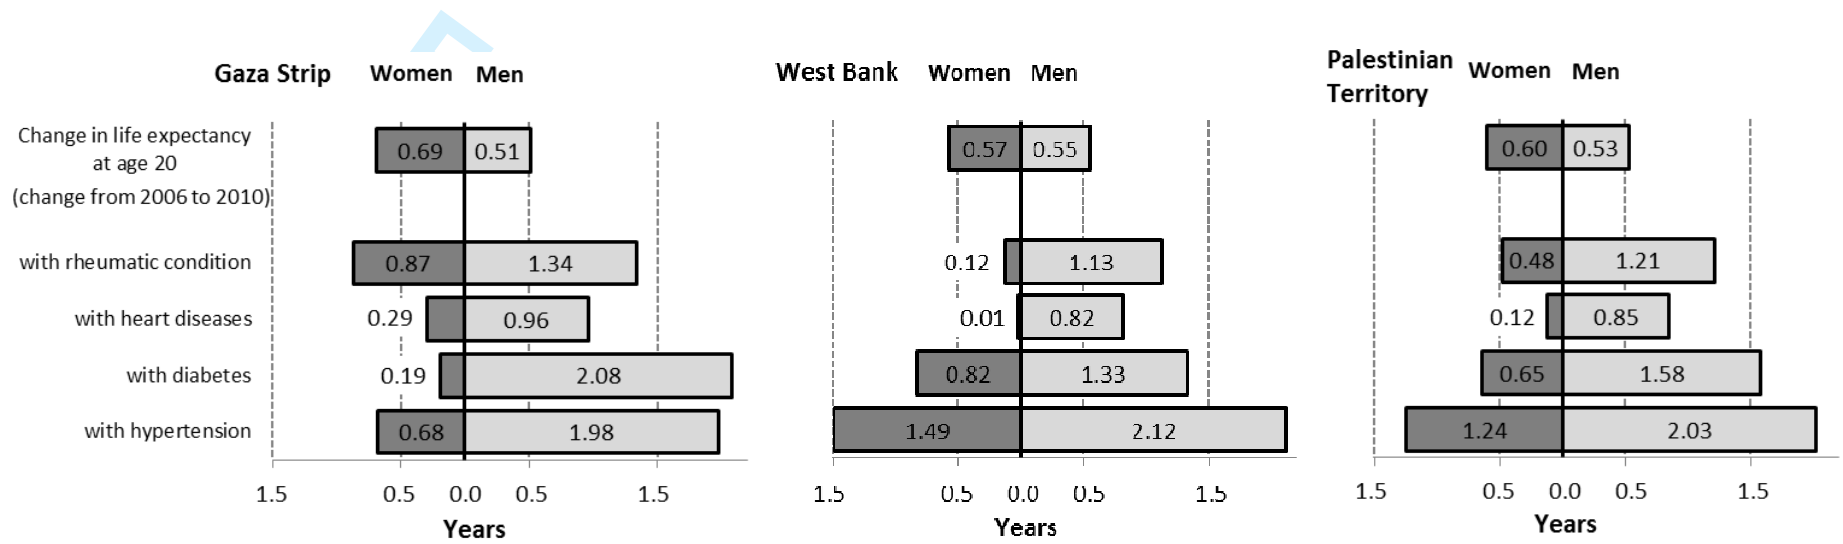

## Discussion

As in other populations, Palestinian women live longer than Palestinian men and endure a greater number of years with health problems. Remarkably, the changes in partial life expectancy (age interval 20 to 60) without chronic disease from 2006 to 2010 went in opposite directions for men and women. Health has thus worsened among men, and the gender gap in expected lifetime with chronic disease has narrowed. The changes in health expectancy between 2006 and 2010 were mainly due to the increasing prevalence of chronic disease and not due to increasing life expectancy (figure 1). The gain in life expectancy for men thus consisted not only of additional years with hypertension, diabetes, heart disease, and rheumatic conditions because expected lifetime without these diseases was shorter in 2010 than in 2006. This tendency toward expansion of morbidity was less distinct for women.

The increase in lifetime with hypertension and diabetes among men is particularly worrisome. Hypertension and diabetes are initial stages of cardiovascular disease, and the risk is elevated because of the high prevalence of tobacco smoking among men. The percentage of smoking among men exceeds 40% but is less than 3% among women.<sup>8 17</sup> Lung cancer is the most frequent cancer type among Palestinian men.<sup>11</sup> In general, chronic disease develops gradually, caused by exposure to risk factors such as the effects of psychological stressors or the long-term cumulative effects of tobacco smoking. Poor nutrition or undernourishment, in particular in the Gaza Strip and during childhood, increases the risk of obesity and chronic disease.<sup>11 18-20</sup> Along with tobacco smoking among men, poor nutrition and physical inactivity are the most important preventable lifestyle-related risk factors for Palestinians. Prevention related to these risk factors requires particular attention in order to reduce the incidence of cardiovascular and metabolic disease.

1  
2  
3 Men – particularly young men – face greater exposure to violations by the Israeli army and  
4 Israeli settlers than do women.<sup>21–24</sup> Since 1967, over a quarter of the Palestinians have been  
5 imprisoned on political grounds and have suffered various health problems following their  
6 release.<sup>25 26</sup> The fluctuations and instability of Palestinians' societal and political life could  
7 affect men and women differently. A survey among young Palestinians in Ramallah showed  
8 that exposure to political violence affects the mental health of adolescents and that depressive-  
9 like symptoms were more prevalent among girls than among boys.<sup>27</sup>

10  
11  
12  
13  
14  
15  
16  
17  
18  
19  
20  
21 Health services and access to diagnosis and treatment are complicated in the West Bank and  
22 the Gaza Strip due to a variety of factors related to restrictions on movement in the West  
23 Bank and the blockade that cuts the Gaza Strip off from the outside world.<sup>5 28</sup> Some of these  
24 deficiencies are, however, partially remedied by humanitarian aid from international bodies.  
25  
26  
27  
28  
29  
30  
31  
32  
33  
34  
35  
36  
37  
38  
39  
40  
41  
42  
43  
44  
45  
46  
47  
48  
49  
50  
51  
52  
53  
54  
55  
56  
57  
58  
59  
60  
As the abnormal living circumstances differ between the West Bank and the Gaza Strip, no  
simple interpretation can be applied to differences between the two territories. In spite of the  
high number of deaths, attacks on medical personnel and civilians, destruction of hospitals,  
*etc.*<sup>29</sup> associated with the Israeli assault on the Gaza Strip shortly before the second survey in  
2010, we cannot expect that this assault would be directly visible in the health expectancy  
estimates. The direct effect of Israeli attacks should be assessed by studies with a more  
focused design, such as on the impact of the Israeli attack on the Gaza Strip,<sup>29–32</sup> the Israeli  
military invasions in the spring of 2002,<sup>27 33</sup> and the army's reaction to the 2000 uprising.<sup>23</sup>

In 2009, the *Lancet* published a series of comprehensive studies on the health status of the  
population and the health services available in the occupied Palestinian territory, providing  
complete information on and evidence of the situation.<sup>5 6 10 11 28</sup> The unsuccessful attempt to  
establish an efficient health-care system under military occupation has also been examined.<sup>28</sup>

1  
2  
3 Health status has not improved satisfactorily since the mid-1990s, and the health services  
4  
5 have remained in stasis.  
6  
7

8  
9  
10 Account has been taken of logistical difficulties related to data collection under military  
11  
12 occupation and how this may influence participation and responses by interviewees. The  
13  
14 quality of the survey data is high due to a thoroughly centralised interview training process,  
15  
16 pilot testing, and the quality-control mechanisms applied to data processing. The Palestinian  
17  
18 Central Bureau of Statistics received technical assistance from international organisations  
19  
20 (UNICEF, UN Population Fund, and the Arab League). Furthermore, the standardisation of  
21  
22 questionnaires and sampling methods enables comparisons over time. Study design,  
23  
24 representativeness, non-participation, *etc.* in the Palestinian Family Health Surveys have been  
25  
26 described previously in reports by the Palestinian Central Bureau of Statistics.<sup>8 12</sup>  
27  
28  
29

30  
31  
32 Over half of the Palestinian population is between the ages of 0 and 19, and less than 5% is  
33  
34 over 60 years old. Because the study describes health expectancy at the age of 20, less than  
35  
36 half of the population is presented. Demography in the occupied Palestinian territory requires  
37  
38 great attention to the health and welfare of Palestinian children and adolescents.  
39  
40

41  
42  
43 The occupied Palestinian territory is well supplied by data from health surveys, which could  
44  
45 help strengthen the health information system. We recommend that health expectancy be  
46  
47 introduced as a summary measure of population health for monitoring the health status in  
48  
49 Palestine. The data necessary for introducing this indicator is available by conducting  
50  
51 successive uniformly designed health surveys. Coordination with and the simultaneity of the  
52  
53 Pan Arab Project for Family Health furthermore enables future comparisons of health  
54  
55 expectancy between populations in the Arab countries.  
56  
57  
58  
59  
60



## Article summary

### Article Focus

- Health expectancy divides life expectancy into average lifetime in various states of health
- The concept of health expectancy has attracted increased interest among researchers and policymakers as a summary measure of population health and has been estimated in nearly all European countries as well as in many other countries worldwide but has never been estimated for a Middle Eastern population
- The study presents expected lifetime with and without chronic disease as well as what changes have taken place among Palestinians living in the Israeli-occupied Palestinian territory over the past five years

### Key Messages

- Expected lifetime with the four most prevalent chronic diseases (hypertension, diabetes, heart diseases, and rheumatic conditions) has increased for men. For women, the gain in life expectancy was more evenly distributed as years with and without diseases
- The divergent trends for men and women might be due to different exposures to lifestyle-related risk factors (e.g. smoking) and the impact of military occupation

### Strengths and Limitations

- The household response rates of the Palestinian Family Health Surveys of 2006 and 2010 were 88.0% and 89.4% and included information on 17 034 and 38 071 adult participants respectively
- In spite of difficulties related to data collection under military occupation representativeness and high quality of the survey data were ensured. International organisations contributed with technical assistance

## References

1. UNRWA Statistics-2010. Selected Indicators. United Nation Relief and Works Agency for Palestine Refugees in the Near East, 2011.  
<http://www.unrwa.org/userfiles/2011120434013.pdf> (accessed May 5, 2012).
2. Statistical yearbook of Palestine 2011. Palestinian National Authority, Palestinian Central Bureau of Statistics. Ramallah, 2011.  
[http://www.pcbs.gov.ps/Portals/\\_PCBS/Downloads/book1814.pdf](http://www.pcbs.gov.ps/Portals/_PCBS/Downloads/book1814.pdf) (accessed May 5, 2012).
3. Special Statistical Bulletin on the 63<sup>rd</sup> anniversary of the Palestinian Nakba. Palestinian Central Bureau of Statistics. Ramallah, 2011.  
[http://www.pcbs.gov.ps/Portals/\\_pcbs/PressRelease/Nakba\\_E63.pdf](http://www.pcbs.gov.ps/Portals/_pcbs/PressRelease/Nakba_E63.pdf) (accessed May 5, 2012).
4. World Bank. Towards a Palestinian State: Reforms for Fiscal Strengthening. World Bank, 2010.  
[http://siteresources.worldbank.org/INTWESTBANKGAZA/Resources/WorldBankReport\\_AHLCApril2010Final.pdf](http://siteresources.worldbank.org/INTWESTBANKGAZA/Resources/WorldBankReport_AHLCApril2010Final.pdf) (accessed May 5, 2012).
5. Giacaman R, Khatib R, Shabaneh L, et al. Health status and health services in the occupied Palestinian territory. *Lancet* 2009;373:837–49.
6. Batniji R, Rabaia Y, Nguyen-Gillham V, et al. Health as human security in the occupied Palestinian territory. *Lancet* 2009;373:1133–43.
7. Rytter MJH, Kjældgaard A-L, Brønnum-Hansen H, et al. Effects of armed conflict on access to emergency health care in Palestinian West Bank: systematic collection of data in emergency departments. *BMJ* 2006;332:1122-24.
8. Palestinian National Authority, Palestinian Central Bureau of Statistics. Palestinian Family Survey, 2010, Main Report, Ramallah, 2011.

- 1  
2  
3 [http://www.pcbs.gov.ps/Portals/\\_PCBS/Downloads/book1821.pdf](http://www.pcbs.gov.ps/Portals/_PCBS/Downloads/book1821.pdf) (accessed May 5,  
4  
5 2012).  
6  
7  
8 9. World Health Organisation, Eastern Mediterranean Regional Office.  
9  
10 <http://www.emro.who.int/emrinfo/index.aspx?Ctry=pal> (accessed May 5, 2012).  
11  
12 10. Rahim HFA, Wick L, Halileh S, et al. Maternal and child health in the occupied  
13  
14 Palestinian territory. *Lancet* 2009;373:967–77.  
15  
16 11. Husseini A, Abu-Rmeileh NME, Mikki N, et al. Cardiovascular diseases, diabetes  
17  
18 mellitus, and cancer in the occupied Palestinian territory. *Lancet* 2009;373:1041–49.  
19  
20 12. Palestinian Central Bureau of Statistics. Palestinian Family Health Survey, 2006: Final  
21  
22 report. Ramallah, 2007.  
23  
24 [http://www.pcbs.gov.ps/Portals/\\_PCBS/Downloads/book1416.pdf](http://www.pcbs.gov.ps/Portals/_PCBS/Downloads/book1416.pdf) (accessed May 5,  
25  
26 2012).  
27  
28  
29 13. MORTPAK for Windows. The United Nations Software Package for Demographic  
30  
31 Measurement. Developed by the United Nations Population Division Department of  
32  
33 Economic and Social Affairs.  
34  
35 <http://www.un.org/esa/population/publications/mortpak/MORTPAKwebpage.pdf>  
36  
37 (accessed May 5, 2012).  
38  
39  
40 14. Sullivan DF. A single index of mortality and morbidity. Health Services and Mental  
41  
42 Health Administration (HSMHA). *Health Rep* 1971;86:347–54.  
43  
44 15. Jagger C, Cox B, Roy SL, et al. Health expectancy calculation by the Sullivan method: A  
45  
46 practical guide, 3<sup>rd</sup> Edition. EHEMU Technical report 2006\_3, 2007.  
47  
48 [http://www.eurohex.eu/pdf/Sullivan\\_guide\\_final\\_jun2007.pdf](http://www.eurohex.eu/pdf/Sullivan_guide_final_jun2007.pdf) (accessed May 5, 2012).  
49  
50  
51 16. Nusselder WJ, Looman CW. Decomposition of differences in health expectancy by  
52  
53 cause. *Demography* 2004;41:315–34.  
54  
55  
56  
57  
58  
59  
60

- 1  
2  
3 17. Abu-Rmeileh NME, Alderete E, Duque LF, et al. Smoking among adolescents and  
4 teenagers living under conflict: cross-sectional surveys in three settings. *TheLancet.com*  
5  
6  
7 Published online July 5, 2011  
8  
9  
10 <http://download.thelancet.com/flatcontentassets/pdfs/palestine/palestine2011-9.pdf>  
11  
12 (accessed May 5, 2012).
- 13  
14 18. Nasser K, Awartani F, Hasan J. Nutritional status in Palestinian schoolchildren living in  
15 West Bank and Gaza Strip: a cross-sectional survey. *TheLancet.com* Published online  
16  
17 July 2, 2010  
18  
19  
20 <http://download.thelancet.com/flatcontentassets/pdfs/palestine/S0140673610608136.pdf>  
21  
22 (accessed May 5, 2012).
- 23  
24  
25 19. Mikki N, Abdul-Rahim HF, Awartani F, et al. Prevalence and sociodemographic  
26 correlates of stunting, underweight, and overweight among Palestinian school adolescents  
27  
28 (13-15 years) in two major governorates in the West Bank. *BMC Public Health*  
29  
30 2009;9:485.  
31  
32
- 33  
34 20. Mikki N, Abdul-Rahim HF, Shi Z, et al. Dietary habits of Palestinian adolescents in three  
35 major governorates in the West Bank: a cross-sectional survey. *TheLancet.com* Published  
36  
37 online July 2, 2010  
38  
39  
40 <http://download.thelancet.com/flatcontentassets/pdfs/palestine/S0140673610608483.pdf>  
41  
42 (accessed May 5, 2012).
- 43  
44  
45 21. Halileh SO. Israeli-Palestinian conflict. Need for medical services for Palestinians injured  
46  
47 in West Bank is urgent. *BMJ* 2002;324:361.  
48
- 49  
50 22. Ferriman A. Palestinian territories face huge burden of disability *BMJ* 2002;324:320.  
51
- 52 23. Helweg-Larsen K, Al-Qadi AHAI, Al-Jabriri J, et al. Systematic medical data collection  
53  
54 of intentional injuries during armed conflicts. a pilot study conducted in West Bank,  
55  
56 Palestine. *Scand J Public Health* 2004;32:17-23.  
57  
58  
59  
60

- 1  
2  
3  
4 24. Ghuneim NI, Abed Y. Effects of non-fatal injuries during the war on Gaza Strip on  
5 quality of life: a cross-sectional study. *TheLancet.com* Published online July 2, 2010  
6 <http://download.thelancet.com/flatcontentassets/pdfs/palestine/S0140673610608458.pdf>  
7  
8 (accessed May 5, 2012).  
9  
10  
11  
12 25. Nashif E. Palestinian Political Prisoners: Identity and Community. New York: Routledge,  
13 2008.  
14  
15  
16  
17 26. El Sarraj E, Punamaki RL, Salmi S, et al. Experience of torture and ill-treatment and  
18 posttraumatic stress disorder symptoms among Palestinian political prisoners. *J Trauma*  
19 *Stress* 1996;9:595–606.  
20  
21  
22  
23 27. Giacaman R, Shannon HS, Saab H, et al. Individual and collective exposure to political  
24 violence: Palestinian adolescents coping with conflict. *Eur J Public Health* 2007;17:361–  
25 8.  
26  
27  
28  
29  
30 28. Mataria A Khatib R, Donaldson C, et al. The health-care system: an assessment and  
31 reform agenda. *Lancet* 2009;373:1207–17.  
32  
33  
34 29. Marton R. Human rights violations during Israel’s attack on the Gaza Strip: 27 December  
35 2008 to 19 January 2009. *Glob Public Health* 2011;6:560–69.  
36  
37  
38  
39 30. Abu-Rmeileh NME, Hammoudeh W, Giacaman R. Humanitarian crisis and social  
40 suffering in Gaza Strip: an initial analysis of aftermath of latest Israeli war.  
41 *TheLancet.com* Published online July 2, 2010  
42 <http://download.thelancet.com/flatcontentassets/pdfs/palestine/S014067361060846X.pdf>  
43  
44 (accessed May 5, 2012).  
45  
46  
47  
48  
49 31. Ashour M, Ghuneim N, Yaghi A. Civilians’ experience in the Gaza Strip during the  
50 Operation Cast Lead by Israel. *TheLancet.com* Published online July 5, 2011  
51 <http://download.thelancet.com/flatcontentassets/pdfs/palestine/palestine2011-1.pdf>  
52  
53 (accessed May 5, 2012).  
54  
55  
56  
57  
58  
59  
60

- 1  
2  
3 32. Ziadni M, Hammoudeh W, Abu-Rmeileh NME, et al. Human insecurity and associated  
4 factors in the Gaza Strip 6 months after 2008-09 Israeli attack: a cross-sectional survey.  
5  
6  
7 *TheLancet.com* Published online July 5, 2011  
8  
9 <http://download.thelancet.com/flatcontentassets/pdfs/palestine/palestine2011-2.pdf>  
10  
11 (accessed May 5, 2012).  
12  
13  
14 33. Giacaman R, Hussein A, Gordon NH, et al. Imprints on the consciousness. The impact  
15 on Palestinian civilians of the Israeli Army invasion of West Bank towns. *Eur J Public*  
16  
17 *Health* 2004;14:286–90.  
18  
19  
20  
21  
22  
23  
24  
25  
26  
27  
28  
29  
30  
31  
32  
33  
34  
35  
36  
37  
38  
39  
40  
41  
42  
43  
44  
45  
46  
47  
48  
49  
50  
51  
52  
53  
54  
55  
56  
57  
58  
59  
60



**Health expectancy in the occupied Palestinian territory:  
estimates from the Gaza Strip and the West Bank - based on  
surveys from 2006 and 2010**

|                                 |                                                                                                                                                                                                   |
|---------------------------------|---------------------------------------------------------------------------------------------------------------------------------------------------------------------------------------------------|
| Journal:                        | <i>BMJ Open</i>                                                                                                                                                                                   |
| Manuscript ID:                  | bmjopen-2012-001572.R1                                                                                                                                                                            |
| Article Type:                   | Research                                                                                                                                                                                          |
| Date Submitted by the Author:   | 10-Sep-2012                                                                                                                                                                                       |
| Complete List of Authors:       | Qlalweh, Khaled; Palestinian Central Bureau of Statistics, Duraidi, Mohammed; Palestinian Central Bureau of Statistics, Brønnum-Hansen, Henrik; Copenhagen University, Institute of Public Health |
| <b>Primary Subject Heading</b>: | Public health                                                                                                                                                                                     |
| Secondary Subject Heading:      | Epidemiology                                                                                                                                                                                      |
| Keywords:                       | EPIDEMIOLOGY, PUBLIC HEALTH, Health expectancy                                                                                                                                                    |
|                                 |                                                                                                                                                                                                   |

SCHOLARONE™  
Manuscripts

September 2012

Word count, main text: 3079

Word count, abstract: 253

**Health expectancy in the occupied Palestinian territory: estimates from the Gaza Strip and the West Bank – based on surveys from 2006 and 2010**

Khaled Qlalweh, Mohammed Duraidi, Henrik Brønnum-Hansen

Palestinian Central Bureau of Statistics, Ramallah, Palestine Khaled Qlalweh Director of Health Statistics

Palestinian Central Bureau of Statistics, Ramallah, Palestine Mohammed Duraidi Director of Demographic and Population Statistics

National Institute of Public Health, University of Southern Denmark, Øster Farimagsgade 5, 1353 Copenhagen, Denmark Henrik Brønnum-Hansen

Faculty of Health Sciences, Department of Public Health, University of Copenhagen, Øster Farimagsgade 5, 1014 Copenhagen, Denmark Henrik Brønnum-Hansen postdoc

**Corresponding author** Henrik Brønnum-Hansen, Faculty of Health Sciences, Department of Public Health, University of Copenhagen, Øster Farimagsgade 5, 1014 Copenhagen, Denmark Telephone: +45 35 32 79 74 E-mail: Henrik.Bronnum-Hansen@sund.ku.dk

**Conflicts of interest** We declare that we have no conflicts of interest. We had no support from any organisation for the submitted work and no financial relationships with any organisations that might have an interest in the submitted work in the previous three years, no other relationships or activities that could appear to have influenced the submitted work. We declare that no ethical approval was required for the study.

**Contributors** KQ and HBH initiated the study. KQ and MD provided life tables and health status prevalence tables. HBH undertook the analysis and drafted the manuscript. All authors have contributed to the writing of the manuscript and have seen and approved the final version.

**Acknowledgements** This study was supported by a grant at University of Southern Denmark for establishing international research collaboration (HBH).

Results for 2006 were presented at the 23rd Annual Meeting of REVES, International Network on Health Expectancy, 25-27 May 2011, Paris, France. Travelling expenses for KQ were covered by a grant supporting the REVES meeting.



**Abstract**

**Objectives** The purpose of the study was to estimate health expectancy for the Palestinian population and to evaluate changes that have taken place over the past five years.

**Design** Mortality data and population-based health surveys.

**Setting** The Israeli-occupied Palestinian territory of the Gaza Strip and the West Bank.

**Participants** 17 034 and 38 071 adults aged 20 or over participating the Palestinian Family Health Surveys of 2006 and 2010. Mortality rates for 2007 and 2010 covered the entire population.

**Outcome measures** Life expectancy and expected lifetime with and without chronic disease were estimated using the Sullivan method on the basis of mortality data and data on the prevalence of chronic disease.

**Results** Life expectancy at the age of 20 increased from 52.8 years in 2006 to 53.3 years in 2010 for men and from 55.1 years to 55.7 years for women. In 2006, expected lifetime without a chronic disease was 37.7 (95% CI: 37.0 to 38.3) years and 32.5 (95% CI: 31.9 to 33.2) years for 20-year-old men and women respectively. By 2010, this had decreased by 1.6 years for men and increased by 1.3 years for women. The health status of men has worsened. In particular, lifetime with hypertension and diabetes has increased. For women, the gain in life expectancy consisted partly of years with and partly of years without the most prevalent diseases.

**Conclusions** Health expectancy for men and women diverged, which could to some extent be due to gender-specific exposures related to lifestyle factors and the impact of military occupation.

**Keywords** health expectancy, life expectancy, occupied Palestinian territory

## Introduction

The number of Palestinians worldwide recently reached 11 million. Fewer than half (4.2 million) live in the occupied Palestinian territory. Of these, two million are refugees, the majority living in camps.<sup>1</sup> As only 1.3 million Palestinians live in Israel, 5.5 million of the Palestinian population lives abroad. The total area of historical Palestine is 27 000 square kilometres. Six percent of this was controlled by Jewish immigrants prior to the United Nations resolution on the partition of Palestine in 1947. Today, Israel controls 85% of the total area of historical Palestine. The Gaza Strip is one of the most densely populated parts of the World, with about 4300 individuals per square kilometre.<sup>2,3</sup> Continued land confiscation and intensified tightening of the closure system has increased the prevalence of economic crises, unemployment, and poverty, thereby strengthening dependency on donor financing.<sup>4</sup> Restrictions on freedom of movement, trading, employment, living a healthy life, access to health care, *etc.* threaten welfare and public health.<sup>5-7</sup>

In 2010, the share of the population under the age of 20 in the occupied Palestinian territory was 53.3%, with 4.4% of the population being aged 60 years or older.<sup>8</sup> According to WHO EMRO, the crude birth rate was 31 births per 1000 persons in 2010, and the crude death rate was 2.7 deaths per 1000 persons.<sup>9</sup> In 2009 life expectancy at birth was 70.5 years for men and 73.2 for women.<sup>10</sup> The six leading causes of death are heart disease (21.0% of all deaths), cerebrovascular disease (11.0%), cancer (10.3%), conditions in perinatal period (8.6%), respiratory disorders (6.9%), and accidents (5.4%).<sup>11</sup>

Figure 1 depicts the associations between selected structural indicators (income index, education index and unemployment rate) and life expectancy in some Middle East countries from data assessed by UNDP International Human Development Indicators,<sup>12</sup> UN Statistics

1  
2  
3 Division – Demographic and Social Statistics<sup>13</sup> and WHO, Global Health Observatory Data  
4  
5 Repository.<sup>10</sup> Iraq and Israel represent the extremes. Life expectancy for Palestinian men is  
6  
7 close to that of the male populations of Syrian Arab Republic and Lebanon. For Palestinian  
8  
9 women life expectancy is low and close to that of Egyptian women. It appears clearly that in  
10  
11 particular low income level and high prevalence of unemployment retard the development in  
12  
13 the occupied Palestinian territory.  
14  
15  
16  
17  
18  
19  
20  
21  
22  
23  
24  
25  
26  
27  
28  
29  
30  
31  
32  
33  
34  
35  
36  
37  
38  
39  
40  
41  
42  
43  
44  
45  
46  
47  
48  
49  
50  
51  
52  
53  
54  
55  
56  
57  
58  
59  
60

**Fig 1 Income index, education index and unemployment rates by contrast with life expectancy in selected Middle East countries**

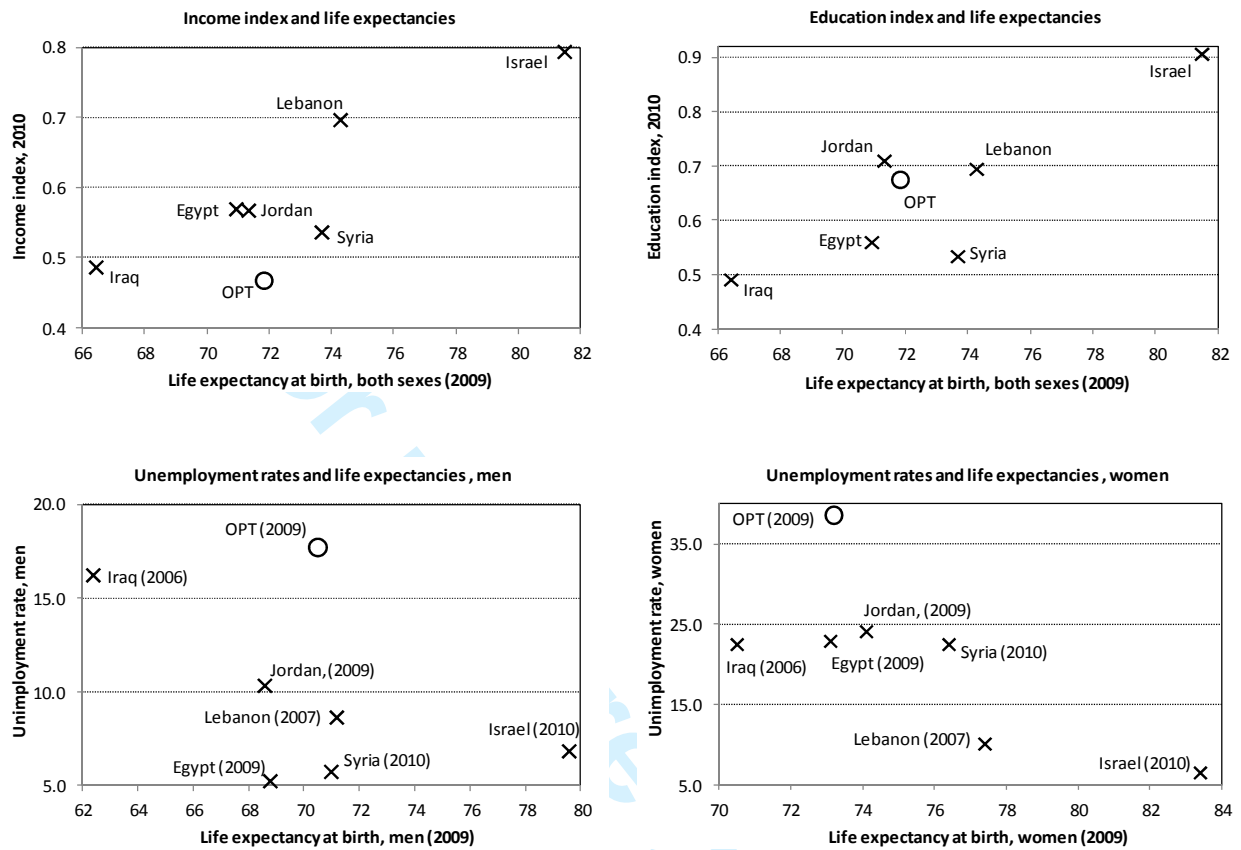

1  
2  
3 Health expectancy represents the average lifetime a person can expect to live in a specific  
4 state of health (*e.g.* with or without chronic disease). As a summary measure of population  
5 health that combines health status and mortality, health expectancy has the strength of  
6 offering a more nuanced contribution to the monitoring of population health than do  
7 measurements of life expectancy. Health expectancy can be measured in various ways and for  
8 different population groups, *i.e.* based on a geographical area, a social group, or a group with  
9 other characteristics. The purpose of this study was to estimate expected lifetime with or  
10 without chronic disease among Palestinians living in the Gaza Strip and the West Bank and to  
11 evaluate changes that have taken place over the past five years.  
12  
13  
14  
15  
16  
17  
18  
19  
20  
21  
22  
23  
24

## 25 **Methods**

26  
27  
28 Health prevalence data was derived from the Palestinian Family Health Surveys carried out in  
29 2006 and 2010.<sup>8 14</sup> The surveys were designed to be representative of the entire Palestinian  
30 population of the occupied Palestinian territory (*i.e.* the Gaza Strip and the West Bank,  
31 including East Jerusalem). The half million Israelis living in illegal settlements on the West  
32 Bank and the more than five million exiled Palestinians were not represented in this study.  
33  
34  
35  
36  
37  
38  
39  
40  
41

42 For each survey, a stratified two-stage random sample was drawn from lists of all Palestinian  
43 households. First, enumeration areas were selected from the Palestinian territories, then a  
44 random sample of households was drawn from each enumeration area in the West Bank and  
45 the Gaza Strip. The surveys consisted of 13 238 households in 2006 and 15 355 households in  
46 2010. The household response rates were 88.0% in 2006 and 89.4% in 2010. Only in a  
47 subsample (7056 households) of the 2006 survey questions on chronic diseases were asked  
48 and the present study included adults aged 20 or above from the two surveys: 17 034 and 38  
49 071 participants respectively. Information on household members' socio-economic and  
50  
51  
52  
53  
54  
55  
56  
57  
58  
59  
60

1  
2  
3 demographic characteristics was provided by the head of household or another mature person.  
4  
5 Data for all members was collected by self-reported responses or by proxy. Age was assessed  
6  
7 by asking for the exact date of birth or any document with this information. Further details are  
8  
9 available in the survey reports.<sup>8 14</sup>  
10

11  
12  
13  
14 Chronic disease was measured by answers to the question ‘Does (name) have any disease  
15  
16 according to a medical diagnosis and receive treatment continuously?’ Whenever disease was  
17  
18 reported, its nature was determined by choosing among 20 diseases. According to data from  
19  
20 the Palestinian Family Survey of 2010,<sup>8</sup> the four most frequently reported diseases were  
21  
22 hypertension, diabetes, rheumatic condition, and heart disease. The crude prevalence  
23  
24 proportions among adults (aged 20 and above) were 8.5%, 6.5%, 4.9%, and 2.7% respectively  
25  
26 in 2010.  
27  
28

29  
30  
31  
32 In preparation for constructing life tables child and infant mortality rates at the age of 0–4  
33  
34 years were estimated on the basis of data from the Palestinian Family Health Surveys, and  
35  
36 abridged life tables were constructed using MortPak, the UN demographic measurement  
37  
38 software package.<sup>15</sup>  
39  
40

41  
42  
43 Health expectancy at the age of 20 was estimated using the Sullivan method<sup>16 17</sup> in which the  
44  
45 expected number of years lived in the age intervals of 20–24, 25–29, ..., 70–74, >75 years  
46  
47 were calculated on the basis of the life table figures and multiplied by age-specific  
48  
49 proportions of healthy people taken from the health survey data. Health expectancy for 20-  
50  
51 year-olds was then calculated by adding these years for all age groups and dividing the sum  
52  
53 by the number of survivors at the age of 20. A measure of the portion of lifetime spent in  
54  
55 good health was obtained by dividing lifetime in a healthy state with life expectancy.  
56  
57  
58  
59  
60

1  
2  
3 Furthermore, estimations were made of partial life expectancy, *i.e.* expected lifetime between  
4 the ages of 20 and 60. Statistical tests were carried out using a Z-test.<sup>17</sup>  
5  
6  
7

8  
9 A technique for decomposing health expectancies based on the Sullivan method enables  
10 comparisons over time of contributions to mortality differences and health differences.<sup>18</sup> A  
11 change in age-specific mortality will change life expectancy because a greater or lesser  
12 number of years lived affects not only the specific age group but also the years lived in future  
13 older age groups. This change (the mortality effect) will increase or reduce expected lifetime  
14 in different health states. A change in the proportion of healthy people represents the  
15 decomposition's other component (the health effect).  
16  
17  
18  
19  
20  
21  
22  
23  
24  
25  
26

## 27 **Results**

28  
29 Life expectancy at the age of 20 was about half a year longer among men living in the West  
30 Bank than it was in the Gaza Strip and increased by half a year from 2006 to 2010 (table 1).  
31 For women, life expectancy increased by a little more than half a year, and the difference  
32 between the West Bank and the Gaza Strip remained nearly one year (table 2). For 60 year  
33 olds, life expectancy increased by 0.2 years in the West Bank and by 0.3 years in the Gaza  
34 Strip.  
35  
36  
37  
38  
39  
40  
41  
42  
43  
44

45 During this period, expected lifetime without chronic disease at the age of 20 decreased  
46 statistically significantly by 1.6 years for men in the West Bank ( $p=0.02$ ) and statistically  
47 insignificantly by 1.3 years in the Gaza Strip ( $p=0.17$ ) (table 1). Simultaneously, expected  
48 lifetime with chronic disease among male Palestinians increased significantly by  
49 approximately 2 years ( $p<0.001$ ). Partial life expectancy between the ages of 20 and 60 with  
50 chronic disease increased from 7.0 years in 2006 to 7.4 years in 2010 (table 1). Among 60-  
51  
52  
53  
54  
55  
56  
57  
58  
59  
60

year-old men, expected lifetime with chronic disease increased by 1.7 years. The proportion of expected lifetime without chronic disease between the ages of 20 and 60 declined from 81.8% to 80.7% and from 43.9% to 34.7% for 60 years olds (table 1). This change does not differ between the West bank and the Gaza Strip.

**Table 1 Life expectancy at age 20 and 60, partial life expectancy (age 20–60), and expected lifetime without and with chronic disease, and proportion of expected lifetime without chronic disease – Men, Palestine, 2006 and 2010**

|                                                      | Calendar year | Life expectancy years | Expected lifetime without chronic disease years (95% CI) | Expected lifetime with chronic disease years (95% CI) | Proportion of expected lifetime without chronic disease % (95% CI) |
|------------------------------------------------------|---------------|-----------------------|----------------------------------------------------------|-------------------------------------------------------|--------------------------------------------------------------------|
| <b>20-year-old men</b>                               |               |                       |                                                          |                                                       |                                                                    |
| Gaza Strip                                           | 2006          | 52.4                  | 37.8 (36.7 to 38.9)                                      | 14.6 (13.4 to 15.7)                                   | 72.2 (70.0 to 74.4)                                                |
|                                                      | 2010          | 52.9                  | 36.5 (35.7 to 37.2)                                      | 16.4 (15.7 to 17.2)                                   | 69.0 (67.5 to 70.4)                                                |
| West Bank                                            | 2006          | 52.9                  | 37.6 (36.8 to 38.4)                                      | 15.3 (14.5 to 16.1)                                   | 71.0 (69.5 to 72.5)                                                |
|                                                      | 2010          | 53.5                  | 36.0 (35.4 to 36.5)                                      | 17.5 (17.0 to 18.0)                                   | 67.3 (66.3 to 68.3)                                                |
| Palestinian Territory                                | 2006          | 52.8                  | 37.7 (37.0 to 38.3)                                      | 15.1 (14.4 to 15.7)                                   | 71.4 (70.2 to 72.7)                                                |
|                                                      | 2010          | 53.3                  | 36.1 (35.7 to 36.6)                                      | 17.1 (16.7 to 17.6)                                   | 67.8 (67.0 to 68.7)                                                |
| <b>60-year-old men</b>                               |               |                       |                                                          |                                                       |                                                                    |
| Gaza Strip                                           | 2006          | 16.9                  | 7.6 (6.5 to 8.7)                                         | 9.4 (8.3 to 10.5)                                     | 44.6 (38.1 to 51.2)                                                |
|                                                      | 2010          | 17.2                  | 6.1 (5.3 to 6.8)                                         | 11.1 (10.3 to 11.8)                                   | 35.4 (31.1 to 39.7)                                                |
| West Bank                                            | 2006          | 17.2                  | 7.5 (6.7 to 8.2)                                         | 9.7 (9.0 to 10.4)                                     | 43.5 (39.1 to 47.8)                                                |
|                                                      | 2010          | 17.4                  | 6.0 (5.5 to 6.5)                                         | 11.4 (10.9 to 11.9)                                   | 34.3 (31.5 to 37.2)                                                |
| Palestinian Territory                                | 2006          | 17.1                  | 7.5 (6.9 to 8.1)                                         | 9.6 (9.0 to 10.2)                                     | 43.9 (40.3 to 47.5)                                                |
|                                                      | 2010          | 17.3                  | 6.0 (5.6 to 6.4)                                         | 11.3 (10.9 to 11.7)                                   | 34.7 (32.3 to 37.0)                                                |
| <b>Partial life expectancy between age 20 and 60</b> |               |                       |                                                          |                                                       |                                                                    |
| <b>20-year-old men</b>                               |               |                       |                                                          |                                                       |                                                                    |
| Gaza Strip                                           | 2006          | 38.2                  | 31.5 (30.8 to 32.1)                                      | 6.7 (6.0 to 7.4)                                      | 82.4 (80.7 to 84.2)                                                |
|                                                      | 2010          | 38.3                  | 31.3 (30.9 to 31.8)                                      | 7.0 (6.6 to 7.4)                                      | 81.7 (80.6 to 82.9)                                                |
| West Bank                                            | 2006          | 38.3                  | 31.2 (30.8 to 31.7)                                      | 7.1 (6.6 to 7.6)                                      | 81.5 (80.3 to 82.8)                                                |
|                                                      | 2010          | 38.5                  | 30.8 (30.5 to 31.2)                                      | 7.7 (7.3 to 8.0)                                      | 80.1 (79.3 to 81.0)                                                |
| Palestinian Territory                                | 2006          | 38.3                  | 31.3 (30.9 to 31.7)                                      | 7.0 (6.6 to 7.3)                                      | 81.8 (80.8 to 82.8)                                                |
|                                                      | 2010          | 38.4                  | 31.0 (30.7 to 31.3)                                      | 7.4 (7.2 to 7.7)                                      | 80.7 (80.0 to 81.3)                                                |

For 20-year-old women living in the West Bank, expected lifetime without chronic disease increased statistically significantly by 1.6 years ( $p=0.02$ ) (table 2). The gain in disease-free



1  
2  
3 life expectancy thus exceeded the increase in life expectancy. In the Gaza Strip, the gain of  
4  
5 0.7 years in life expectancy among 20-year-old women was evenly distributed, with 0.5 years  
6  
7 without disease and 0.2 years with disease (table 2). For Palestinian women between ages of  
8  
9 20 and 60, expected years with chronic disease decreased from 10.6 to 9.1 during the period  
10  
11 of 2006-2010 (table 2). The general gain in disease-free life expectancy did not, however,  
12  
13 favour elderly Palestinian women. Thus, among 60-year-old women, expected lifetime with  
14  
15 chronic disease increased by 0.8 years (table 2).  
16  
17  
18  
19  
20  
21  
22  
23  
24  
25  
26  
27  
28  
29  
30  
31  
32  
33  
34  
35  
36  
37  
38  
39  
40  
41  
42  
43  
44  
45  
46  
47  
48  
49  
50  
51  
52  
53  
54  
55  
56  
57  
58  
59  
60

**Table 2 Life expectancy at age 20 and 60, partial life expectancy (age 20–60), and expected lifetime without and with chronic disease, and proportion of expected lifetime without chronic disease – Women, Palestine, 2006 and 2010**

|                                                      | Calendar year | Life expectancy years | Expected lifetime without chronic disease years (95% CI) | Expected lifetime with chronic disease years (95% CI) | Proportion of expected lifetime without chronic disease % (95% CI) |
|------------------------------------------------------|---------------|-----------------------|----------------------------------------------------------|-------------------------------------------------------|--------------------------------------------------------------------|
| <b>20-year-old women</b>                             |               |                       |                                                          |                                                       |                                                                    |
| Gaza Strip                                           | 2006          | 54.5                  | 34.4 (33.3 to 35.5)                                      | 20.1 (19.0 to 21.2)                                   | 63.1 (61.1 to 65.2)                                                |
|                                                      | 2010          | 55.2                  | 34.9 (34.2 to 35.7)                                      | 20.3 (19.5 to 21.0)                                   | 63.2 (61.9 to 64.6)                                                |
| West Bank                                            | 2006          | 55.4                  | 31.6 (30.8 to 32.4)                                      | 23.8 (23.0 to 24.6)                                   | 57.1 (55.6 to 58.5)                                                |
|                                                      | 2010          | 56.0                  | 33.2 (32.7 to 33.7)                                      | 22.8 (22.2 to 23.3)                                   | 59.3 (58.4 to 60.2)                                                |
| Palestinian Territory                                | 2006          | 55.1                  | 32.5 (31.9 to 33.2)                                      | 22.5 (21.9 to 23.2)                                   | 59.1 (57.9 to 60.2)                                                |
|                                                      | 2010          | 55.7                  | 33.8 (33.3 to 34.2)                                      | 21.9 (21.5 to 22.4)                                   | 60.6 (59.9 to 61.4)                                                |
| <b>60-year-old women</b>                             |               |                       |                                                          |                                                       |                                                                    |
| Gaza Strip                                           | 2006          | 18.5                  | 5.7 (4.7 to 6.6)                                         | 12.8 (11.8 to 13.8)                                   | 30.6 (25.3 to 35.9)                                                |
|                                                      | 2010          | 18.8                  | 5.2 (4.6 to 5.9)                                         | 13.6 (12.9 to 14.2)                                   | 27.9 (24.4 to 31.4)                                                |
| West Bank                                            | 2006          | 18.9                  | 5.0 (4.3 to 5.6)                                         | 13.9 (13.3 to 14.6)                                   | 26.3 (22.9 to 29.7)                                                |
|                                                      | 2010          | 19.2                  | 4.4 (4.0 to 4.8)                                         | 14.8 (14.3 to 15.2)                                   | 22.9 (20.7 to 25.2)                                                |
| Palestinian Territory                                | 2006          | 18.8                  | 5.2 (4.6 to 5.7)                                         | 13.6 (13.0 to 14.1)                                   | 27.6 (24.7 to 30.5)                                                |
|                                                      | 2010          | 19.0                  | 4.7 (4.3 to 5.0)                                         | 14.4 (14.0 to 14.7)                                   | 24.5 (22.6 to 26.4)                                                |
| <b>Partial life expectancy between age 20 and 60</b> |               |                       |                                                          |                                                       |                                                                    |
| <b>20 year-old women</b>                             |               |                       |                                                          |                                                       |                                                                    |
| Gaza Strip                                           | 2006          | 38.4                  | 29.5 (28.8 to 30.2)                                      | 8.9 (8.2 to 9.7)                                      | 76.7 (74.9 to 78.6)                                                |
|                                                      | 2010          | 38.6                  | 30.3 (29.8 to 30.8)                                      | 8.3 (7.9 to 8.8)                                      | 78.4 (77.2 to 79.6)                                                |
| West Bank                                            | 2006          | 38.7                  | 27.2 (26.7 to 27.7)                                      | 11.5 (10.9 to 12.0)                                   | 70.4 (69.0 to 71.7)                                                |
|                                                      | 2010          | 38.8                  | 29.3 (28.9 to 29.6)                                      | 9.6 (9.2 to 9.9)                                      | 75.4 (74.5 to 76.3)                                                |
| Palestinian Territory                                | 2006          | 38.6                  | 28.0 (27.6 to 28.4)                                      | 10.6 (10.2 to 11.0)                                   | 72.5 (71.4 to 73.6)                                                |
|                                                      | 2010          | 38.7                  | 29.6 (29.3 to 29.9)                                      | 9.1 (8.9 to 9.4)                                      | 76.4 (75.7 to 77.1)                                                |

Figure 2 shows the results of decomposing into mortality and health effects the change over time in disease-free life expectancy at the age of 20. The mortality effect of approximately one fourth of a year was nearly equal for men and women and did not differ between the Gaza Strip and the West Bank. The divergent change from 2006 to 2010 between men and women in expected lifetime without chronic disease thus resulted from the health effect (*i.e.* prevalence of disease increased among men and decreased among women).

**Fig 2 Decomposition into the mortality and health effects of changes between 2006 and 2010 in disease-free life expectancy at age 20 in the occupied Palestinian territory**

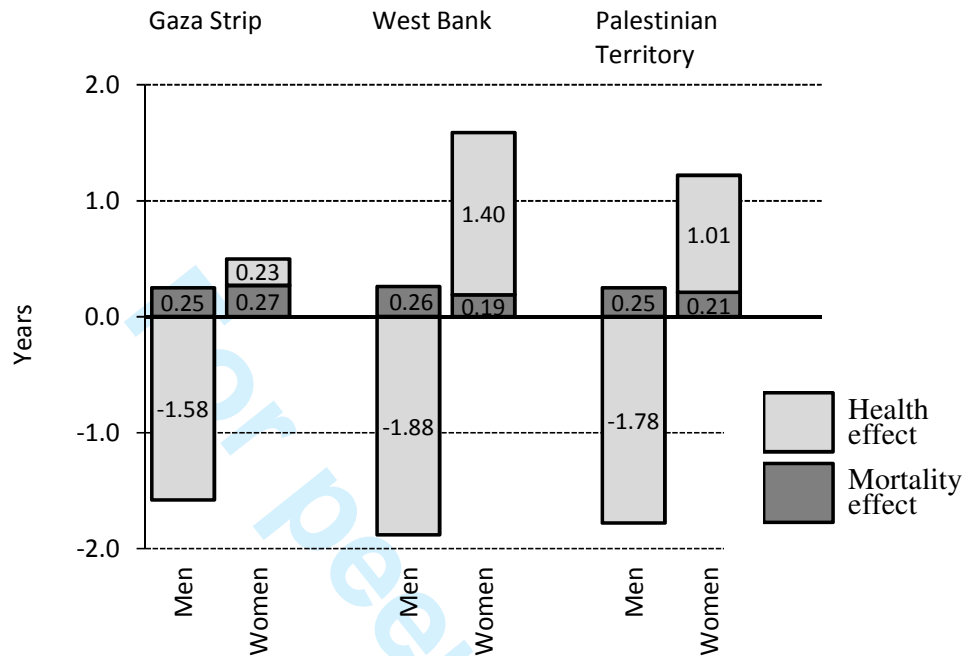

In 2010, 20-year-old men and women could expect 3.6 years (95% CI: 3.3 to 3.9) and 3.2 years (95% CI: 3.0 to 3.5) with heart disease respectively. For the three other most prevalent chronic conditions, women could expect a greater number of years with a disease than could men (12.5 versus 7.7 years with hypertension, 8.3 versus 6.7 years with diabetes, and 6.8 versus 3.6 years with rheumatic conditions) (table 3). No gain in disease-free life expectancy was observed for any of the four diseases, with the exception of heart disease among women. In particular, the health status of men worsened, and the gender gap decreased during the period of 2006 to 2010 (table 3, figure 3).

**Table 3 Life expectancy at age 20 and expected lifetime with the four most prevalent diseases – Palestine, 2006 and 2010**

|                          | Calendar year | Life expectancy years | Expected lifetime with Hypertension years (95% CI) | Diabetes years (95% CI) | Heart diseases years (95% CI) | Rheumatic conditions years (95% CI) |
|--------------------------|---------------|-----------------------|----------------------------------------------------|-------------------------|-------------------------------|-------------------------------------|
| <b>20-year-old men</b>   |               |                       |                                                    |                         |                               |                                     |
| Gaza Strip               | 2006          | 52.4                  | 6.0 (5.1 to 6.8)                                   | 4.6 (3.9 to 5.4)        | 2.4 (1.8 to 2.9)              | 2.1 (1.5 to 2.7)                    |
|                          | 2010          | 52.9                  | 7.9 (7.2 to 8.6)                                   | 6.7 (6.0 to 7.4)        | 3.3 (2.8 to 3.8)              | 3.4 (2.9 to 4.0)                    |
| West Bank                | 2006          | 52.9                  | 5.5 (4.9 to 6.1)                                   | 5.4 (4.8 to 6.0)        | 2.9 (2.4 to 3.3)              | 2.5 (2.1 to 3.0)                    |
|                          | 2010          | 53.5                  | 7.6 (7.2 to 8.1)                                   | 6.8 (6.3 to 7.2)        | 3.7 (3.3 to 4.1)              | 3.7 (3.3 to 4.0)                    |
| Palestinian Territory    | 2006          | 52.8                  | 5.7 (5.2 to 6.2)                                   | 5.1 (4.7 to 5.6)        | 2.7 (2.4 to 3.1)              | 2.4 (2.0 to 2.7)                    |
|                          | 2010          | 53.3                  | 7.7 (7.3 to 8.1)                                   | 6.7 (6.3 to 7.1)        | 3.6 (3.3 to 3.9)              | 3.6 (3.3 to 3.9)                    |
| <b>20-year-old women</b> |               |                       |                                                    |                         |                               |                                     |
| Gaza Strip               | 2006          | 54.5                  | 11.8 (10.8 to 12.8)                                | 7.9 (7.0 to 8.8)        | 2.4 (1.8 to 3.0)              | 4.1 (3.4 to 4.8)                    |
|                          | 2010          | 55.2                  | 12.5 (11.7 to 13.2)                                | 8.1 (7.4 to 8.7)        | 2.7 (2.3 to 3.2)              | 5.0 (4.4 to 5.6)                    |
| West Bank                | 2006          | 55.4                  | 10.9 (10.2 to 11.7)                                | 7.5 (6.9 to 8.2)        | 3.5 (3.0 to 4.0)              | 7.6 (7.0 to 8.3)                    |
|                          | 2010          | 56.0                  | 12.4 (11.9 to 13.0)                                | 8.4 (7.9 to 8.8)        | 3.5 (3.1 to 3.9)              | 7.8 (7.3 to 8.2)                    |
| Palestinian Territory    | 2006          | 55.1                  | 11.2 (10.6 to 11.8)                                | 7.6 (7.1 to 8.1)        | 3.1 (2.7 to 3.5)              | 6.4 (5.9 to 6.9)                    |
|                          | 2010          | 55.7                  | 12.5 (12.0 to 12.9)                                | 8.3 (7.9 to 8.7)        | 3.2 (3.0 to 3.5)              | 6.8 (6.5 to 7.2)                    |

**Fig 3 Change between 2006 and 2010 in life expectancy and expected lifetime at age 20 with the four most frequent chronic diseases in the occupied Palestinian territories**



## Discussion

As in other populations, Palestinian women live longer than Palestinian men and endure a greater number of years with health problems. But Palestinian women's advantage of 2.7 more years of expected lifetime in 2009 is much less than the gender difference in the neighbouring populations. During the last 20 years life expectancy has increased more for Palestinian men than women, but for both genders the increase has generally been slower for Palestinians than for the neighbouring populations (figure 4).

**Fig 4 Life expectancy at age 20 in the occupied Palestinian territory and other Middle East countries**

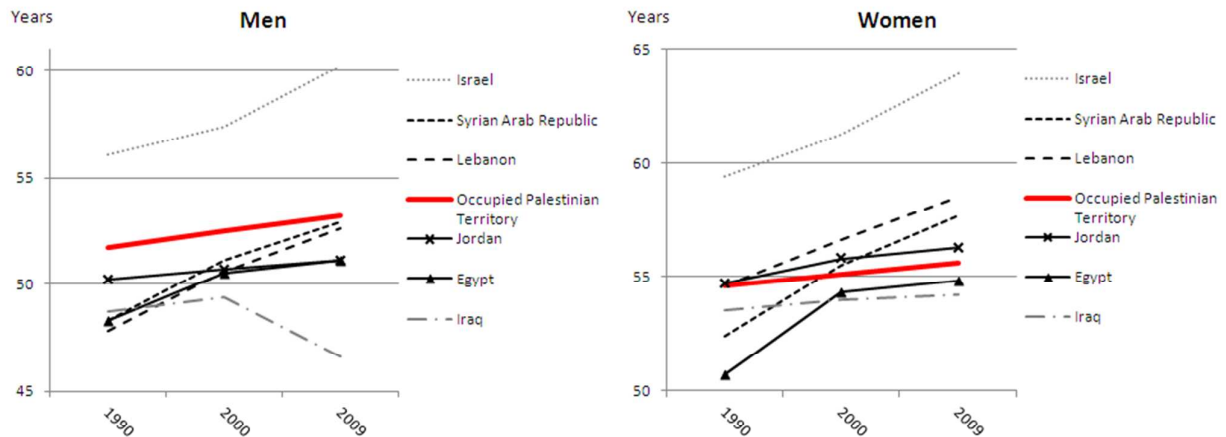

Sources: World Health Organisation, Global Health Observatory Data Repository and Palestinian Central Bureau of Statistics

Remarkably, the changes in partial life expectancy (age interval 20 to 60) without chronic disease from 2006 to 2010 went in opposite directions for men and women. At age 60 lifetime without chronic disease decreased for both sexes, but more among men than women. Health has thus worsened among men, and the gender gap in expected lifetime with chronic disease has thus worsened among men, and the gender gap in expected lifetime with chronic disease has narrowed. The changes in health expectancy between 2006 and 2010 were mainly due to the increasing prevalence of chronic disease and not due to increasing life expectancy (figure 2). The gain in life expectancy for men thus consisted not only of additional years with

1  
2  
3 hypertension, diabetes, heart disease, and rheumatic conditions because expected lifetime  
4 without these diseases was shorter in 2010 than in 2006. This tendency toward expansion of  
5 morbidity was less distinct for women.  
6  
7  
8

9  
10  
11 The increase in lifetime with hypertension and diabetes among men is particularly worrisome,  
12 although it might partly reflect trends in ascertainment. Hypertension and diabetes are initial  
13 stages of cardiovascular disease, and the risk is elevated because of the high prevalence of  
14 tobacco smoking among men. The percentage of smoking among men exceeds 40% but is  
15 less than 3% among women.<sup>8 19</sup> The prevalence of smoking is significantly higher in the  
16 West Bank than the Gaza Strip. The percentage of smokers aged 18 and over has declined  
17 from 29.2% in 2000 to 26.9% in 2010 in the West Bank and from 24.1% to 14.6 in the Gaza  
18 Strip.<sup>8</sup> Lung cancer is the most frequent cancer type among Palestinian men.<sup>11</sup> In general,  
19 chronic disease develops gradually, caused by exposure to risk factors such as the effects of  
20 psychological stressors or the long-term cumulative effects of tobacco smoking. Poor  
21 nutrition or undernourishment, in particular in the Gaza Strip and during childhood, increases  
22 the risk of obesity and chronic disease.<sup>11 20-22</sup> Along with tobacco smoking among men, poor  
23 nutrition and physical inactivity are the most important preventable lifestyle-related risk  
24 factors for Palestinians. Prevention related to these risk factors requires particular attention in  
25 order to reduce the incidence of cardiovascular and metabolic disease.  
26  
27  
28  
29  
30  
31  
32  
33  
34  
35  
36  
37  
38  
39  
40  
41  
42  
43  
44  
45  
46

47 Men – particularly young men – face greater exposure to violations by the Israeli army and  
48 Israeli settlers than do women.<sup>23-26</sup> Since 1967, an unknown number of Palestinians, mostly  
49 young men, have been imprisoned on political grounds and have suffered various health  
50 problems following their release.<sup>27 28</sup> The fluctuations and instability of Palestinians' societal  
51 and political life could affect men and women differently. A survey among young Palestinians  
52  
53  
54  
55  
56  
57  
58  
59  
60

1  
2  
3 in Ramallah showed that exposure to political violence affects the mental health of  
4  
5 adolescents and that depressive-like symptoms were more prevalent among girls than among  
6  
7 boys.<sup>29</sup>  
8  
9

10  
11 Health services and access to diagnosis and treatment are complicated in the West Bank and  
12  
13 the Gaza Strip due to a variety of factors related to restrictions on movement in the West  
14  
15 Bank and the blockade that cuts the Gaza Strip off from the outside world.<sup>5 30</sup> Some of these  
16  
17 deficiencies are, however, partially remedied by humanitarian aid from international bodies.  
18  
19 As the character of the abnormal living circumstances differ between the West Bank and the  
20  
21 Gaza Strip, no simple interpretation can be applied to differences between the two territories.  
22  
23 The economic hardship can be illustrated by the high unemployment rates. According to the  
24  
25 Palestinian National Authority the unemployment rates in 2011 were 15.9% and 22.6 % for  
26  
27 men and women in the West Bank and 25.8% and 44.0% in the Gaza Strip.<sup>31</sup>  
28  
29  
30  
31  
32  
33

34 In spite of the high number of deaths, attacks on medical personnel and civilians, destruction  
35  
36 of hospitals, *etc.*<sup>32</sup> associated with the Israeli assault on the Gaza Strip shortly before the  
37  
38 second survey in 2010, we cannot expect that this assault would be directly visible in the  
39  
40 health expectancy estimates. The direct effect of Israeli attacks should be assessed by studies  
41  
42 with a more focused design, such as on the impact of the Israeli attack on the Gaza Strip,<sup>32-36</sup>  
43  
44 the Israeli military invasions in the spring of 2002,<sup>29 37</sup> and the army's reaction to the 2000  
45  
46 uprising.<sup>25</sup>  
47  
48  
49  
50  
51

52 In 2009, the *Lancet* published a series of comprehensive studies on the health status of the  
53  
54 population and the health services available in the occupied Palestinian territory, providing  
55  
56 complete information on and evidence of the situation.<sup>5 6 11 30 38</sup> The unsuccessful attempt to  
57  
58  
59  
60



1  
2  
3 establish an efficient health-care system under military occupation has also been examined.<sup>30</sup>  
4  
5 Health status has not improved satisfactorily since the mid-1990s, and the health services  
6  
7 have remained in stasis.<sup>30</sup>  
8  
9

10  
11 Account has been taken of logistical difficulties related to data collection under military  
12  
13 occupation and how this may influence participation and responses by interviewees. The  
14  
15 quality of the survey data is high due to a thoroughly centralised interview training process,  
16  
17 pilot testing, and the quality-control mechanisms applied to data processing. The Palestinian  
18  
19 Central Bureau of Statistics received technical assistance from international organisations  
20  
21 (UNICEF, UN Population Fund, and the Arab League). Furthermore, the standardisation of  
22  
23 questionnaires and sampling methods enables comparisons over time. Study design,  
24  
25 representativeness, non-participation, *etc.* in the Palestinian Family Health Surveys have been  
26  
27 described previously in reports by the Palestinian Central Bureau of Statistics.<sup>8 14</sup>  
28  
29  
30  
31

32  
33  
34 Over half of the Palestinian population is between the ages of 0 and 19, and less than 5% is  
35  
36 over 60 years old. Thus, we did not estimate the widely used disability-free life expectancy  
37  
38 indicator that is typically based on questions related to ageing such as functional disability in  
39  
40 activities of daily living (ADLs) or instrumental activities of daily living (IADLs). The  
41  
42 Minimum European Health Module includes a question on chronic conditions: 'Do you suffer  
43  
44 from any long-standing illness or condition (health problem)?'<sup>39</sup> Health expectancy estimates  
45  
46 based on this question are available for European countries.<sup>40</sup> Among the 25 EU member  
47  
48 states in 2005 life expectancy at age 65 varied from 12.5 years to 17.7 years for men and from  
49  
50 17.1 years to 22.0 years for women. The average expected lifetime without chronic morbidity  
51  
52 was estimated at 9.6 years for 65-year-old men and 12.4 years for 65-year-old women.<sup>40</sup> In  
53  
54 general life expectancy was lowest in East European countries. While uniformly constructed  
55  
56  
57  
58  
59  
60

1  
2  
3 life tables make international comparisons of life expectancy possible it is a challenge to  
4  
5 compare health expectancies. Due to the lack of international harmonised questionnaires  
6  
7 including chronic disease questions we still need comparable data on health expectancy.  
8  
9 However, figure 5 presents expected lifetime with chronic disease for 65-year-old Estonians,  
10  
11 Hungarians, Latvians, Lithuanians, Slovaks and the whole Europe (EU25) in 2005 <sup>40</sup> and  
12  
13 Palestinians in 2006. Because the wording of the questions on chronic diseases in the  
14  
15 Minimum European Health Module and in the Palestinian Family Health Survey 2006 differs  
16  
17 it is unwise to attribute much weight to the comparison of expected lifetime with chronic  
18  
19 disease between the European countries and the occupied Palestinian territory.  
20  
21  
22  
23  
24

25 There was a striking different gender gap in life expectancy between Europeans and  
26  
27 Palestinians (figure 5). Among 65-year-old Palestinians the women's life expectancy was  
28  
29 only 10% longer than men's whereas the gap in the East European countries varied between  
30  
31 28% and 35%. The average gap in EU25 was 22%. The different gender gap in life  
32  
33 expectancy and health expectancy between the more established EU countries and the newer  
34  
35 EU countries has been discussed previously. <sup>41 42</sup>  
36  
37  
38  
39  
40  
41  
42  
43  
44  
45  
46  
47  
48  
49  
50  
51  
52  
53  
54  
55  
56  
57  
58  
59  
60

**Fig 5 Life expectancy and expected lifetime with chronic disease\*) at age 65 in selected European countries, the whole EU, and the occupied Palestinian territory**

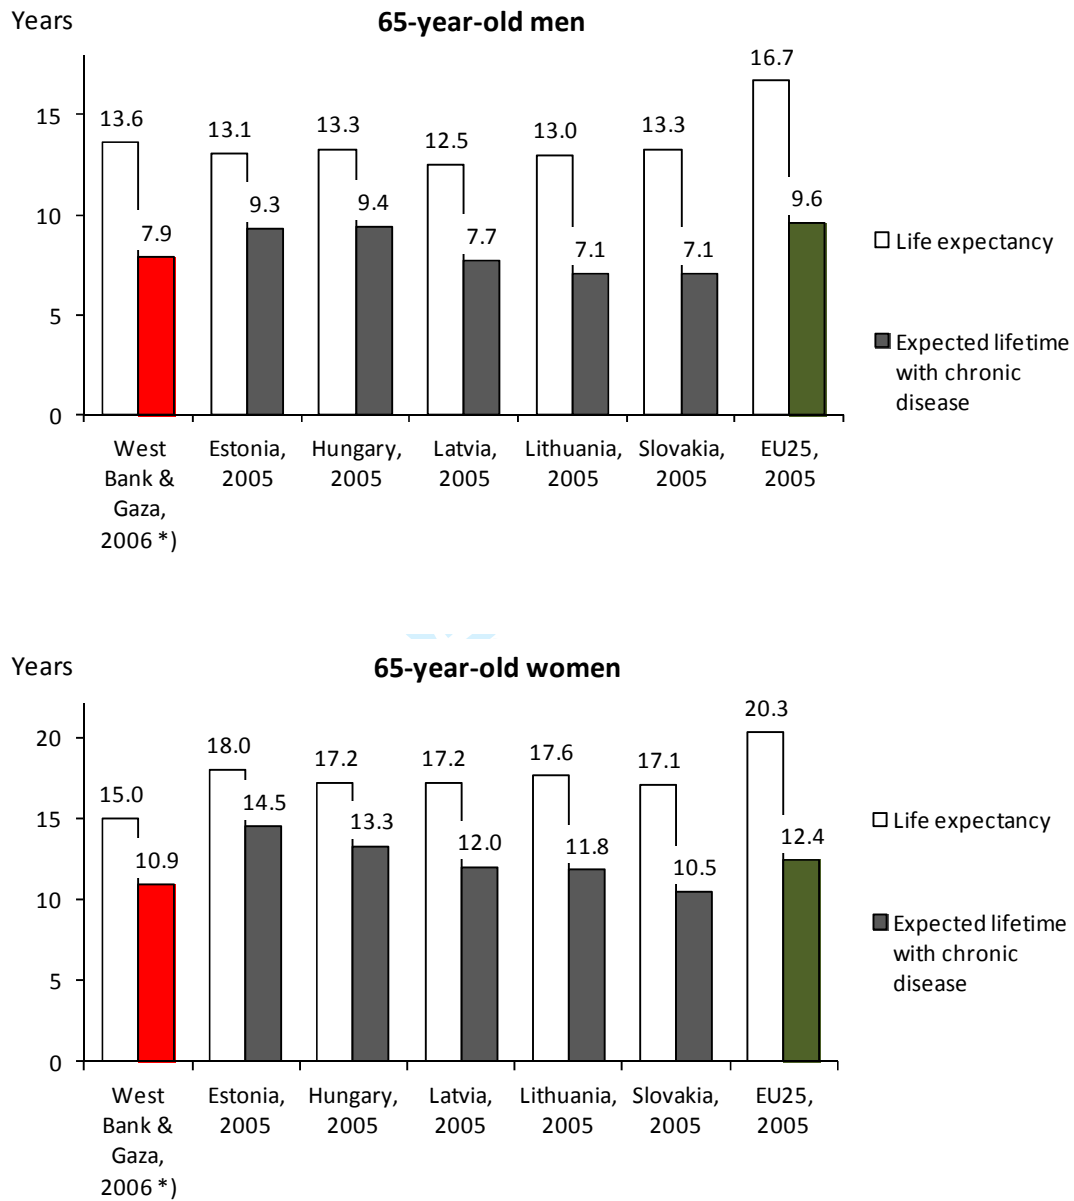

\*) Different questions on chronic diseases in the Minimum European Health Module and the Palestinian Family Health Survey (see text)

1  
2  
3 Because the study describes health expectancy after the age of 20, less than half of the  
4 population is presented. Demography in the occupied Palestinian territory requires great  
5 attention to the health and welfare of Palestinian children and adolescents.  
6  
7  
8  
9

10  
11 The occupied Palestinian territory is well supplied by data from health surveys, which could  
12 help strengthen the health information system. We recommend that health expectancy be  
13 introduced as a summary measure of population health for monitoring the health status in  
14 Palestine. The data necessary for introducing this indicator is available by conducting  
15 successive uniformly designed health surveys. Coordination with and the simultaneity of the  
16 Pan Arab Project for Family Health furthermore enables future comparisons of health  
17 expectancy between populations in the Arab countries.  
18  
19  
20  
21  
22  
23  
24  
25  
26  
27  
28  
29  
30  
31  
32  
33  
34  
35  
36  
37  
38  
39  
40  
41  
42  
43  
44  
45  
46  
47  
48  
49  
50  
51  
52  
53  
54  
55  
56  
57  
58  
59  
60

**Article summary****Article Focus**

- Health expectancy divides life expectancy into average lifetime in various states of health
- The concept of health expectancy has attracted increased interest among researchers and policymakers as a summary measure of population health and has been estimated in nearly all European countries as well as in many other countries worldwide but has never been estimated for a Middle Eastern population
- The study presents expected lifetime with and without chronic disease as well as what changes have taken place among Palestinians living in the Israeli-occupied Palestinian territory over the past five years

**Key Messages**

- Expected lifetime with the four most prevalent chronic diseases (hypertension, diabetes, heart diseases, and rheumatic conditions) has increased for men. For women, the gain in life expectancy was more evenly distributed as years with and without diseases
- The divergent trends for men and women might be due to different exposures to lifestyle-related risk factors (e.g. smoking) and the impact of military occupation

**Strengths and Limitations**

- The household response rates of the Palestinian Family Health Surveys of 2006 and 2010 were 88.0% and 89.4% and included information on 17 034 and 38 071 adult participants respectively
- In spite of difficulties related to data collection under military occupation representativeness and high quality of the survey data were ensured. International organizations contributed with technical assistance

## References

1. UNRWA Statistics-2010. Selected Indicators. United Nation Relief and Works Agency for Palestine Refugees in the Near East, 2011.  
<http://www.unrwa.org/userfiles/2011120434013.pdf> (accessed September 7, 2012).
2. Statistical yearbook of Palestine 2011. Palestinian National Authority, Palestinian Central Bureau of Statistics. Ramallah, 2011.  
[http://www.pcbs.gov.ps/Portals/\\_PCBS/Downloads/book1814.pdf](http://www.pcbs.gov.ps/Portals/_PCBS/Downloads/book1814.pdf) (accessed September 7, 2012).
3. Special Statistical Bulletin on the 63<sup>rd</sup> anniversary of the Palestinian Nakba. Palestinian Central Bureau of Statistics. Ramallah, 2011.  
[http://www.pcbs.gov.ps/Portals/\\_pcbs/PressRelease/Nakba\\_E63.pdf](http://www.pcbs.gov.ps/Portals/_pcbs/PressRelease/Nakba_E63.pdf) (accessed September 7, 2012).
4. World Bank. Towards a Palestinian State: Reforms for Fiscal Strengthening. World Bank, 2010.  
[http://siteresources.worldbank.org/INTWESTBANKGAZA/Resources/WorldBankReport\\_AHLCApril2010Final.pdf](http://siteresources.worldbank.org/INTWESTBANKGAZA/Resources/WorldBankReport_AHLCApril2010Final.pdf) (accessed September 7, 2012).
5. Giacaman R, Khatib R, Shabaneh L, et al. Health status and health services in the occupied Palestinian territory. *Lancet* 2009;373:837–49.
6. Batniji R, Rabaia Y, Nguyen-Gillham V, et al. Health as human security in the occupied Palestinian territory. *Lancet* 2009;373:1133–43.
7. Rytter MJH, Kjældgaard A-L, Brønnum-Hansen H, et al. Effects of armed conflict on access to emergency health care in Palestinian West Bank: systematic collection of data in emergency departments. *BMJ* 2006;332:1122-4.
8. Palestinian National Authority, Palestinian Central Bureau of Statistics. Palestinian Family Survey, 2010, Main Report, Ramallah, 2011.

- 1  
2  
3 [http://www.pcbs.gov.ps/Portals/\\_PCBS/Downloads/book1821.pdf](http://www.pcbs.gov.ps/Portals/_PCBS/Downloads/book1821.pdf) (accessed September  
4  
5 7, 2012).  
6  
7  
8 9. World Health Organisation, Eastern Mediterranean Regional Office.  
9  
10 <http://rho.emro.who.int/rhodata/?theme=country&vid=21500#> (accessed September 7,  
11 2012).  
12  
13 10. World Health Organisation, Global Health Observatory Data Repository.  
14  
15 <http://apps.who.int/ghodata/?vid=720> (accessed September 7, 2012).  
16  
17 11. Hussein A, Abu-Rmeileh NME, Mikki N, et al. Cardiovascular diseases, diabetes  
18 mellitus, and cancer in the occupied Palestinian territory. *Lancet* 2009;373:1041–9.  
19  
20 12. UNDP International Human Development Indicators <http://hdrstats.undp.org/en/tables>  
21 (accessed September 7, 2012).  
22  
23 13. UN Statistics Division – Demographic and Social Statistics  
24  
25 <http://unstats.un.org/unsd/demographic/products/socind> (accessed September 7, 2012).  
26  
27 14. Palestinian Central Bureau of Statistics. Palestinian Family Health Survey, 2006: Final  
28 report. Ramallah, 2007.  
29  
30 [http://www.pcbs.gov.ps/Portals/\\_PCBS/Downloads/book1416.pdf](http://www.pcbs.gov.ps/Portals/_PCBS/Downloads/book1416.pdf) (accessed September  
31 7, 2012).  
32  
33 15. MORTPAK for Windows. The United Nations Software Package for Demographic  
34 Measurement. Developed by the United Nations Population Division Department of  
35 Economic and Social Affairs.  
36  
37 <http://www.un.org/esa/population/publications/mortpak/MORTPAKwebpage.pdf>  
38 (accessed September 7, 2012).  
39  
40 16. Sullivan DF. A single index of mortality and morbidity. *Health Services and Mental*  
41 *Health Administration (HSMHA)*. *Health Rep* 1971;86:347–54.  
42  
43 17. Jagger C, Cox B, Roy SL, et al. Health expectancy calculation by the Sullivan method: A  
44  
45  
46  
47  
48  
49  
50  
51  
52  
53  
54  
55  
56  
57  
58  
59  
60

1  
2  
3 practical guide, 3<sup>rd</sup> Edition. EHEMU Technical report 2006\_3, 2007.

4  
5 [http://www.eurohex.eu/pdf/Sullivan\\_guide\\_final\\_jun2007.pdf](http://www.eurohex.eu/pdf/Sullivan_guide_final_jun2007.pdf) (accessed September 7,  
6  
7 2012).

- 8  
9  
10 18. Nusselder WJ, Looman CW. Decomposition of differences in health expectancy by  
11  
12 cause. *Demography* 2004;41:315–34.
- 13  
14 19. Abu-Rmeileh NME, Alderete E, Duque LF, et al. Smoking among adolescents and  
15  
16 teenagers living under conflict: cross-sectional surveys in three settings. *TheLancet.com*  
17  
18 Published online July 5, 2011  
19  
20 <http://download.thelancet.com/flatcontentassets/pdfs/palestine/palestine2011-9.pdf>  
21  
22 (accessed September 7, 2012).
- 23  
24 20. Nasser K, Awartani F, Hasan J. Nutritional status in Palestinian schoolchildren living in  
25  
26 West Bank and Gaza Strip: a cross-sectional survey. *TheLancet.com* Published online  
27  
28 July 2, 2010  
29  
30 <http://download.thelancet.com/flatcontentassets/pdfs/palestine/S0140673610608136.pdf>  
31  
32 (accessed September 7, 2012).
- 33  
34 21. Mikki N, Abdul-Rahim HF, Awartani F, et al. Prevalence and sociodemographic  
35  
36 correlates of stunting, underweight, and overweight among Palestinian school adolescents  
37  
38 (13-15 years) in two major governorates in the West Bank. *BMC Public Health*  
39  
40 2009;9:485.
- 41  
42 22. Mikki N, Abdul-Rahim HF, Shi Z, et al. Dietary habits of Palestinian adolescents in three  
43  
44 major governorates in the West Bank: a cross-sectional survey. *TheLancet.com* Published  
45  
46 online July 2, 2010  
47  
48 <http://download.thelancet.com/flatcontentassets/pdfs/palestine/S0140673610608483.pdf>  
49  
50 (accessed September 7, 2012).
- 51  
52  
53  
54  
55  
56 23. Halileh SO. Israeli-Palestinian conflict. Need for medical services for Palestinians injured  
57  
58  
59  
60



- 1  
2  
3 in West Bank is urgent. *BMJ* 2002;324:361.  
4  
5 24. Ferriman A. Palestinian territories face huge burden of disability. *BMJ* 2002;324:320.  
6  
7 25. Helweg-Larsen K, Al-Qadi AH, Al-Jabri J, et al. Systematic medical data collection  
8 of intentional injuries during armed conflicts. a pilot study conducted in West Bank,  
9 Palestine. *Scand J Public Health* 2004;32:17–23.  
10  
11 26. Ghuneim NI, Abed Y. Effects of non-fatal injuries during the war on Gaza Strip on  
12 quality of life: a cross-sectional study. *TheLancet.com* Published online July 2, 2010  
13 <http://download.thelancet.com/flatcontentassets/pdfs/palestine/S0140673610608458.pdf>  
14 (accessed September 7, 2012).  
15  
16 27. Nashif E. Palestinian Political Prisoners: Identity and Community. New York: Routledge,  
17 2008.  
18  
19 28. El Sarraj E, Punamaki RL, Salmi S, et al. Experience of torture and ill-treatment and  
20 posttraumatic stress disorder symptoms among Palestinian political prisoners. *J Trauma*  
21 *Stress* 1996;9:595–606.  
22  
23 29. Giacaman R, Shannon HS, Saab H, et al. Individual and collective exposure to political  
24 violence: Palestinian adolescents coping with conflict. *Eur J Public Health* 2007;17:361–  
25 8.  
26  
27 30. Mataria A, Khatib R, Donaldson C, et al. The health-care system: an assessment and  
28 reform agenda. *Lancet* 2009;373:1207–17.  
29  
30 31. Palestinian National Authority. <http://www.pcbs.gov.ps/site/881/draft.aspx> (accessed  
31 September 7, 2012).  
32  
33 32. Marton R. Human rights violations during Israel's attack on the Gaza Strip: 27 December  
34 2008 to 19 January 2009. *Glob Public Health* 2011;6:560–9.  
35  
36 33. Abu-Rmeileh NME, Hammoudeh W, Giacaman R. Humanitarian crisis and social  
37 suffering in Gaza Strip: an initial analysis of aftermath of latest Israeli war.  
38  
39  
40  
41  
42  
43  
44  
45  
46  
47  
48  
49  
50  
51  
52  
53  
54  
55  
56  
57  
58  
59  
60

1  
2  
3 *TheLancet.com* Published online July 2, 2010

4  
5 <http://download.thelancet.com/flatcontentassets/pdfs/palestine/S014067361060846X.pdf>

6  
7 (accessed September 7, 2012).

- 8  
9  
10 34. Ashour M, Ghuneim N, Yaghi A. Civilians' experience in the Gaza Strip during the  
11 Operation Cast Lead by Israel. *TheLancet.com* Published online July 5, 2011

12  
13 <http://download.thelancet.com/flatcontentassets/pdfs/palestine/palestine2011-1.pdf>

14  
15 (accessed September 7, 2012).

- 16  
17  
18 35. Ziadni M, Hammoudeh W, Abu-Rmeileh NME, et al. Human insecurity and associated  
19 factors in the Gaza Strip 6 months after 2008-09 Israeli attack: a cross-sectional survey.

20  
21 *TheLancet.com* Published online July 5, 2011

22  
23 <http://download.thelancet.com/flatcontentassets/pdfs/palestine/palestine2011-2.pdf>

24  
25 (accessed September 7, 2012).

- 26  
27  
28  
29 36. Abu-Rmeileh NME, Hammoudeh W, Mataria A, et al. Health-related Quality of life of  
30 Gaza Palestinians in the aftermath of the winter 2008–09 Israeli attack on the Strip. *Eur J*  
31 *Public Health* 2011;1-6;[doi:10.1093/eurpub/ckr131](https://doi.org/10.1093/eurpub/ckr131).

- 32  
33  
34  
35  
36 37. Giacaman R, Husseini A, Gordon NH, et al. Imprints on the consciousness. The impact  
37 on Palestinian civilians of the Israeli Army invasion of West Bank towns. *Eur J Public*  
38 *Health* 2004;14:286–90.

- 39  
40  
41  
42 38. Rahim HFA, Wick L, Halileh S, et al. Maternal and child health in the occupied  
43 Palestinian territory. *Lancet* 2009;373:967–77.

- 44  
45  
46  
47 39. Cox B, Van Oyen H, Cambois E, et al. The reliability of the Minimum European Health  
48 Module. *Int J Public Health* 2009;54:55-60.

- 49  
50  
51  
52 40. Jagger C, Robine J-M, Van Oyen H, Cambois E. Life Expectancy with Chronic  
53 Morbidity. In *Healthy Life Years in the European Union: Facts and figures 2005*.  
54 Directorate-General for Health & Consumers, European Communities, 2009.

1  
2  
3 [http://ec.europa.eu/health/ph\\_information/reporting/docs/hly\\_en.pdf](http://ec.europa.eu/health/ph_information/reporting/docs/hly_en.pdf) (accessed September  
4  
5 7, 2012).

- 6  
7 41. Nusselder WJ, Looman CWN, Van Oyen H, Robine JM, Jagger C. Gender differences in  
8 health of EU10 and EU15 populations: the double burden of EU men. *Eur J Ageing*  
9 2010;7:219-27.  
10  
11 42. Van Oyen H, Cox B, Jagger C et al. Gender gap in life expectancy and expected years  
12 with activity limitations af age 50 in the European Union: associations with macro-level  
13 structural indicators. *Eur J Ageing* 2010;7:229-37.  
14  
15  
16  
17  
18  
19  
20  
21  
22  
23  
24  
25  
26  
27  
28  
29  
30  
31  
32  
33  
34  
35  
36  
37  
38  
39  
40  
41  
42  
43  
44  
45  
46  
47  
48  
49  
50  
51  
52  
53  
54  
55  
56  
57  
58  
59  
60

~~30 May~~September 2012

Word count, main text: 3079

Word count, abstract: 253

**Health expectancy in the occupied Palestinian territory: estimates from the Gaza Strip and the West Bank – based on surveys from 2006 and 2010**

Khaled Qlalweh, Mohammed Duraidi, Henrik Brønnum-Hansen

Palestinian Central Bureau of Statistics, Ramallah, Palestine Khaled Qlalweh Director of Health Statistics

Palestinian Central Bureau of Statistics, Ramallah, Palestine Mohammed Duraidi Director of Demographic and Population Statistics

National Institute of Public Health, University of Southern Denmark, Øster Farimagsgade 5, 1353 Copenhagen, Denmark Henrik Brønnum-Hansen

Faculty of Health Sciences, Department of Public Health, University of Copenhagen, Øster Farimagsgade 5, 1014 Copenhagen, Denmark Henrik Brønnum-Hansen postdoc

**Corresponding author** Henrik Brønnum-Hansen, Faculty of Health Sciences, Department of Public Health, University of Copenhagen, Øster Farimagsgade 5, 1014 Copenhagen, Denmark Telephone: +45 35 32 79 74 E-mail: Henrik.Bronnum-Hansen@sund.ku.dk

**Conflicts of interest** We declare that we have no conflicts of interest. We had no support from any organisation for the submitted work and no financial relationships with any organisations that might have an interest in the submitted work in the previous three years, no other relationships or activities that could appear to have influenced the submitted work. We declare that no ethical approval was required for the study.

**Contributors** KQ and HBH initiated the study. KQ and MD provided life tables and health status prevalence tables. HBH undertook the analysis and drafted the manuscript. All authors have contributed to the writing of the manuscript and have seen and approved the final version.

**Acknowledgements** This study was supported by a grant at University of Southern Denmark for establishing international research collaboration (HBH).

Results for 2006 were presented at the 23rd Annual Meeting of REVES, International Network on Health Expectancy, 25-27 May 2011, Paris, France. Travelling expenses for KQ were covered by a grant supporting the REVES meeting.

**Abstract**

**Objectives** The purpose of the study was to estimate health expectancy for the Palestinian population- and to evaluate changes that have taken place over the past five years.

**Design** Mortality data and population-based health surveys.

**Setting** The Israeli-occupied Palestinian territory of the Gaza Strip and the West Bank.

**Participants** 17 034 and 38 071 adults aged 20 or over participating the Palestinian Family Health Surveys of 2006 and 2010. Mortality rates for 2007 and 2010 covered the entire population.

**Outcome measures** Life expectancy and expected lifetime with and without chronic disease were estimated using the Sullivan method on the basis of mortality data and data on the prevalence of chronic disease.

**Results** Life expectancy at the age of 20 increased from 52.8 years in 2006 to 53.3 years in 2010 for men and from 55.1 years to 55.7 years for women. In 2006, expected lifetime without a chronic disease was 37.7 (95% CI: 37.0 to 38.3) years and 32.5 (95% CI: 31.9 to 33.2) years for 20-year-old men and women respectively. By 2010, this had decreased by 1.6 years for men and increased by 1.3 years for women. The health status of men has worsened. In particular, lifetime with hypertension and diabetes has increased. For women, the gain in life expectancy consisted partly of years with and partly of years without the most prevalent diseases.

**Conclusions** Health expectancy for men and women diverged, which could to some extent be due to gender-specific exposures related to lifestyle factors and the impact of military occupation.

**Keywords** health expectancy, life expectancy, occupied Palestinian territory

## Introduction

The number of Palestinians worldwide recently reached 11 million. Fewer than half (4.2 million) live in the occupied Palestinian territory. Of these, two million are refugees, the majority living in camps.<sup>1</sup> As only 1.3 million Palestinians live in Israel, 5.5 million of the Palestinian population lives abroad. The total area of historical Palestine is 27 000 square kilometres. Six percent of this was controlled by Jewish immigrants prior to the United Nations resolution on the partition of Palestine in 1947. Today, Israel controls 85% of the total area of historical Palestine. The Gaza Strip is one of the most densely populated parts of the World, with about 4300 individuals per square kilometre.<sup>2,3</sup> ~~Ever since the state of Israel's establishment in 1948, Palestinians have lived under war conditions, under occupation, or under displacement from their native homes. More than half of the population lives in exile outside of Palestine, and the remaining 4.2 million Palestinians reside in an area of land that has shrunk markedly and is being continuously and systematically eroded by illegal Israeli settlements.~~ Continued land confiscation and intensified tightening of the closure system has increased the prevalence of economic crises, unemployment, and poverty, thereby strengthening dependency on donor financing.<sup>4</sup> Restrictions on freedom of movement, trading, employment, living a healthy life, access to health care, *etc.* threaten welfare and public health.<sup>5-7</sup>

In 2010, the share of the population under the age of 20 in the occupied Palestinian territory was 53.3%, with 4.4% of the population being aged 60 years or older.<sup>8</sup> According to WHO EMRO, the crude birth rate was ~~3129.6~~ births per 1000 persons in 2010, and the crude death rate was ~~3.02.7~~ deaths per 1000 persons.<sup>9</sup> ~~In 2009~~ life expectancy at birth was 70.5 years for men and 73.2 for women.<sup>10</sup> ~~The neonatal mortality rate (deaths per 1000 live births during the first 28 days of life) was 9.4, the infant mortality rate was 25.0 deaths per 1000 live births,~~

1  
2  
3 and the total fertility rate was 4.6 births per woman.<sup>9</sup> The maternal mortality rate was 38 per  
4  
5 10 000 live births.<sup>9</sup> There have been only very modest improvements in infant and child  
6  
7 mortality rates since the 1990s.<sup>10</sup> The ~~six~~three leading causes of death are heart disease  
8  
9 (21.0% of all deaths), cerebrovascular disease (11.0%), ~~and~~ cancer (10.3%), conditions in  
10  
11 perinatal period (8.6%), respiratory disorders (6.9%), and accidents (5.4%).<sup>11</sup>  
12  
13

14  
15  
16 Figure 1 depicts the associations between selected structural indicators (income index,  
17  
18 education index and unemployment rate) and life expectancy in some Middle East countries  
19  
20 from data assessed by UNDP International Human Development Indicators ,<sup>12</sup> UN Statistics  
21  
22 Division – Demographic and Social Statistics<sup>13</sup> and WHO, Global Health Observatory Data  
23  
24 Repository.<sup>10</sup> Iraq and Israel represent the extremes. Life expectancy for Palestinian men is  
25  
26 close to that of the male populations of Syrian Arab Republic and Lebanon. For Palestinian  
27  
28 women life expectancy is low and close to that of Egyptian women. It appears clearly that in  
29  
30 particular low income level and high prevalence of unemployment retard the development in  
31  
32 the occupied Palestinian territory.  
33  
34  
35  
36  
37  
38  
39  
40  
41  
42  
43  
44  
45  
46  
47  
48  
49  
50  
51  
52  
53  
54  
55  
56  
57  
58  
59  
60

Fig 1 Income index, education index and unemployment rates by contrast with life expectancy in selected Middle East countries

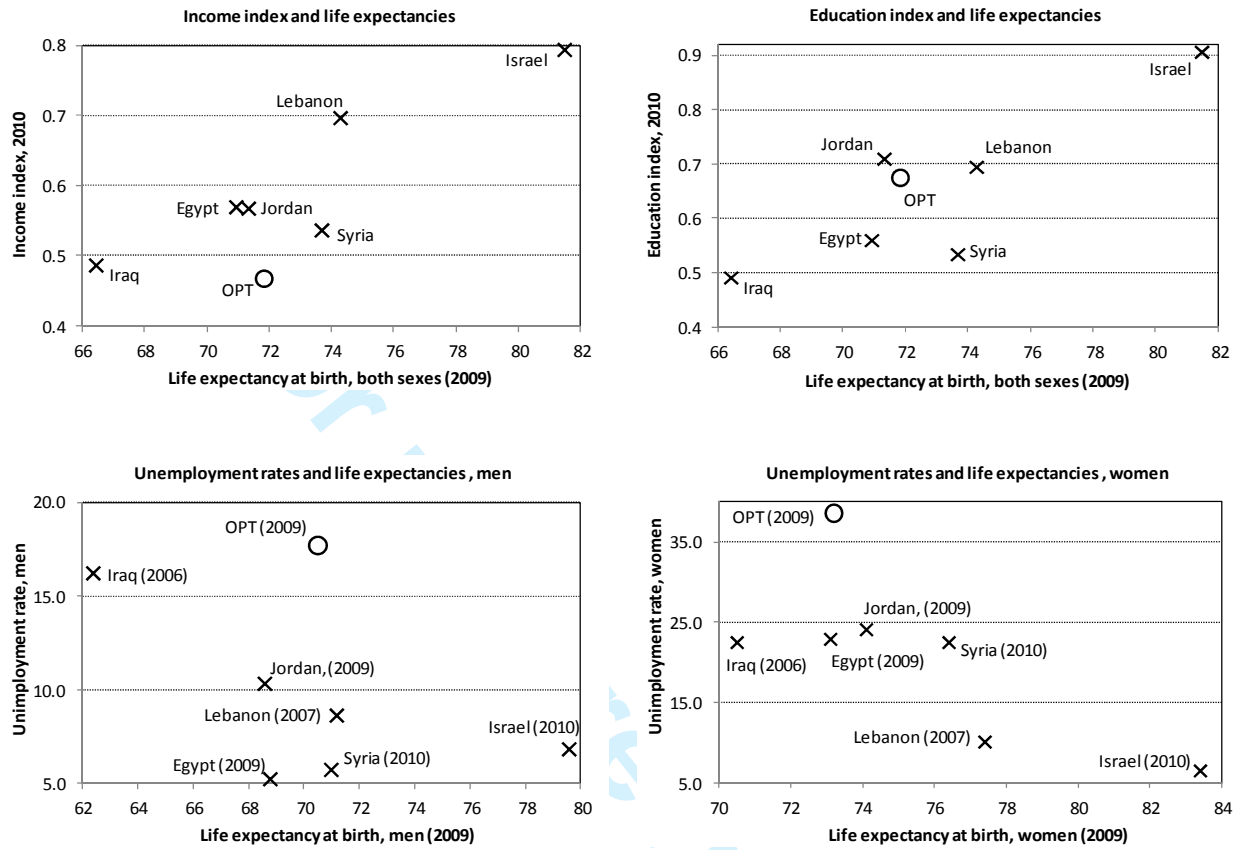



1  
2  
3 Health expectancy represents the average lifetime a person can expect to live in a specific  
4 state of health (*e.g.* with or without chronic disease). As a summary measure of population  
5 health that combines health status and mortality, health expectancy has the strength of  
6 offering a more nuanced contribution to the monitoring of population health than do  
7 measurements of life expectancy. Health expectancy can be measured in various ways and for  
8 different population groups, *i.e.* based on a geographical area, a social group, or a group with  
9 other characteristics. The purpose of this study was to estimate expected lifetime with or  
10 without chronic disease among Palestinians living in the Gaza Strip and the West Bank and to  
11 evaluate changes that have taken place over the past five years.  
12  
13  
14  
15  
16  
17  
18  
19  
20  
21  
22  
23  
24

## 25 **Methods**

26  
27  
28 Health prevalence data was derived from the Palestinian Family Health Surveys carried out in  
29 2006 and 2010.<sup>8 14</sup> The surveys were designed to be representative of the entire Palestinian  
30 population of the occupied Palestinian territory (*i.e.* the Gaza Strip and the West Bank,  
31 including East Jerusalem). The half million Israelis living in illegal settlements on the West  
32 Bank and the more than five million exiled Palestinians were not represented in this study.  
33  
34  
35  
36  
37  
38  
39  
40  
41

42 For each survey, a stratified two-stage random sample was drawn from lists of all Palestinian  
43 households. First, enumeration areas were selected from the Palestinian territories, then a  
44 random sample of households was drawn from each enumeration area in the West Bank and  
45 the Gaza Strip. The surveys consisted of 13 238 households in 2006 and 15 355 households in  
46  
47  
48  
49

50 2010. The household response rates were 88.0% in 2006 and 89.4% in 2010. Only in a  
51 subsample (7056 households) of the 2006 survey questions on chronic diseases were asked  
52 and The present study included adults aged 20 or above from the two surveys: 17 034 and 38  
53  
54  
55  
56  
57  
58  
59  
60  
071 participants respectively. Information on household members' socio-economic and

1  
2  
3 demographic characteristics was provided by the head of household or another mature person.  
4  
5 Data for all members was collected by self-reported responses or by proxy. Age was assessed  
6  
7 by asking for the exact date of birth or any document with this information. Further details are  
8  
9 available in the survey reports.<sup>8 14</sup>  
10

11  
12  
13  
14 Chronic disease was measured by answers to the question ‘Does (name) have any disease  
15  
16 according to a medical diagnosis and receive treatment continuously?’ Whenever disease was  
17  
18 reported, its nature was determined by choosing among 20 diseases. According to data from  
19  
20 the Palestinian Family Survey of 2010,<sup>8</sup> the four most frequently reported diseases were  
21  
22 hypertension, diabetes, rheumatic condition, and heart disease. The crude prevalence  
23  
24 proportions among adults (aged 20 and above) were 8.5%, 6.5%, 4.9%, and 2.7% respectively  
25  
26  
27 in 2010.  
28  
29  
30  
31

32 In preparation for constructing life tables Child and infant mortality rates at the age of 0–4  
33  
34 years were estimated on the basis of data from the Palestinian Family Health Surveys, and  
35  
36 abridged life tables were constructed using MortPak, the UN demographic measurement  
37  
38 software package.<sup>15</sup>  
39  
40  
41

42  
43 Health expectancy at the age of 20 was estimated using the Sullivan method<sup>16 17</sup> in which the  
44  
45 expected number of years lived in the age intervals of 20–24, 25–29, ..., 70–74, >75 years  
46  
47 were calculated on the basis of the life table figures and multiplied by age-specific  
48  
49 proportions of healthy people taken from the health survey data. Health expectancy for 20-  
50  
51 year-olds was then calculated by adding these years for all age groups and dividing the sum  
52  
53 by the number of survivors at the age of 20. A measure of the portion of lifetime spent in  
54  
55 good health was obtained by dividing lifetime in a healthy state with life expectancy.  
56  
57  
58  
59  
60

1  
2  
3 Furthermore, estimations were made of partial life expectancy, *i.e.* expected lifetime between  
4 the ages of 20 and 60. Statistical tests were carried out using a Z-test.<sup>17</sup>  
5  
6  
7

8  
9 A technique for decomposing health expectancies based on the Sullivan method enables  
10 comparisons over time of contributions to mortality differences and health differences.<sup>18</sup> A  
11 change in age-specific mortality will change life expectancy because a greater or lesser  
12 number of years lived affects not only the specific age group but also the years lived in future  
13 older age groups. This change (the mortality effect) will increase or reduce expected lifetime  
14 in different health states. A change in the proportion of healthy people represents the  
15 decomposition's other component (the health effect).  
16  
17  
18  
19  
20  
21  
22  
23  
24  
25  
26

## 27 **Results**

28  
29 Life expectancy at the age of 20 was about half a year longer among men living in the West  
30 Bank than it was in the Gaza Strip and increased by half a year from 2006 to 2010 (table 1).  
31 For women, life expectancy increased by a little more than half a year, and the difference  
32 between the West Bank and the Gaza Strip remained nearly one year (table 2). For 60 year  
33 olds, life expectancy increased by 0.2 years in the West Bank and by 0.3 years in the Gaza  
34 Strip.  
35  
36  
37  
38  
39  
40  
41  
42  
43  
44

45 During this period, expected lifetime without chronic disease at the age of 20 decreased  
46 statistically significantly by 1.6 years for men in the West Bank ( $p=0.02$ ) and statistically  
47 insignificantly by 1.3 years in the Gaza Strip ( $p=0.17$ ) (table 1). Simultaneously, expected  
48 lifetime with chronic disease among male Palestinians increased significantly by  
49 approximately 2 years ( $p<0.001$ ). Partial life expectancy between the ages of 20 and 60 with  
50 chronic disease increased from 7.0 years in 2006 to 7.4 years in 2010 (table 1). Among 60-  
51  
52  
53  
54  
55  
56  
57  
58  
59  
60

year-old men, expected lifetime with chronic disease increased by 1.7 years. The proportion of expected lifetime without chronic disease between the ages of 20 and 60 declined from 81.8% to 80.7% and from 43.9% to 34.7% for 60 years olds (table 1). This change does not differ between the West bank and the Gaza Strip.

**Table 1 Life expectancy at age 20 and 60, partial life expectancy (age 20–60), and expected lifetime without and with chronic disease, and proportion of expected lifetime without chronic disease – Men, Palestine, 2006 and 2010**

|                                                      | Calendar year | Life expectancy years | Expected lifetime without chronic disease years (95% CI) | Expected lifetime with chronic disease years (95% CI) | Proportion of expected lifetime without chronic disease % (95% CI) |
|------------------------------------------------------|---------------|-----------------------|----------------------------------------------------------|-------------------------------------------------------|--------------------------------------------------------------------|
| <b>20-year-old men</b>                               |               |                       |                                                          |                                                       |                                                                    |
| Gaza Strip                                           | 2006          | 52.4                  | 37.8 (36.7 to 38.9)                                      | 14.6 (13.4 to 15.7)                                   | 72.2 (70.0 to 74.4)                                                |
|                                                      | 2010          | 52.9                  | 36.5 (35.7 to 37.2)                                      | 16.4 (15.7 to 17.2)                                   | 69.0 (67.5 to 70.4)                                                |
| West Bank                                            | 2006          | 52.9                  | 37.6 (36.8 to 38.4)                                      | 15.3 (14.5 to 16.1)                                   | 71.0 (69.5 to 72.5)                                                |
|                                                      | 2010          | 53.5                  | 36.0 (35.4 to 36.5)                                      | 17.5 (17.0 to 18.0)                                   | 67.3 (66.3 to 68.3)                                                |
| Palestinian Territory                                | 2006          | 52.8                  | 37.7 (37.0 to 38.3)                                      | 15.1 (14.4 to 15.7)                                   | 71.4 (70.2 to 72.7)                                                |
|                                                      | 2010          | 53.3                  | 36.1 (35.7 to 36.6)                                      | 17.1 (16.7 to 17.6)                                   | 67.8 (67.0 to 68.7)                                                |
| <b>60-year-old men</b>                               |               |                       |                                                          |                                                       |                                                                    |
| Gaza Strip                                           | 2006          | 16.9                  | 7.6 (6.5 to 8.7)                                         | 9.4 (8.3 to 10.5)                                     | 44.6 (38.1 to 51.2)                                                |
|                                                      | 2010          | 17.2                  | 6.1 (5.3 to 6.8)                                         | 11.1 (10.3 to 11.8)                                   | 35.4 (31.1 to 39.7)                                                |
| West Bank                                            | 2006          | 17.2                  | 7.5 (6.7 to 8.2)                                         | 9.7 (9.0 to 10.4)                                     | 43.5 (39.1 to 47.8)                                                |
|                                                      | 2010          | 17.4                  | 6.0 (5.5 to 6.5)                                         | 11.4 (10.9 to 11.9)                                   | 34.3 (31.5 to 37.2)                                                |
| Palestinian Territory                                | 2006          | 17.1                  | 7.5 (6.9 to 8.1)                                         | 9.6 (9.0 to 10.2)                                     | 43.9 (40.3 to 47.5)                                                |
|                                                      | 2010          | 17.3                  | 6.0 (5.6 to 6.4)                                         | 11.3 (10.9 to 11.7)                                   | 34.7 (32.3 to 37.0)                                                |
| <b>Partial life expectancy between age 20 and 60</b> |               |                       |                                                          |                                                       |                                                                    |
| <b>20-year-old men</b>                               |               |                       |                                                          |                                                       |                                                                    |
| Gaza Strip                                           | 2006          | 38.2                  | 31.5 (30.8 to 32.1)                                      | 6.7 (6.0 to 7.4)                                      | 82.4 (80.7 to 84.2)                                                |
|                                                      | 2010          | 38.3                  | 31.3 (30.9 to 31.8)                                      | 7.0 (6.6 to 7.4)                                      | 81.7 (80.6 to 82.9)                                                |
| West Bank                                            | 2006          | 38.3                  | 31.2 (30.8 to 31.7)                                      | 7.1 (6.6 to 7.6)                                      | 81.5 (80.3 to 82.8)                                                |
|                                                      | 2010          | 38.5                  | 30.8 (30.5 to 31.2)                                      | 7.7 (7.3 to 8.0)                                      | 80.1 (79.3 to 81.0)                                                |
| Palestinian Territory                                | 2006          | 38.3                  | 31.3 (30.9 to 31.7)                                      | 7.0 (6.6 to 7.3)                                      | 81.8 (80.8 to 82.8)                                                |
|                                                      | 2010          | 38.4                  | 31.0 (30.7 to 31.3)                                      | 7.4 (7.2 to 7.7)                                      | 80.7 (80.0 to 81.3)                                                |

For 20-year-old women living in the West Bank, expected lifetime without chronic disease increased statistically significantly by 1.6 years ( $p=0.02$ ) (table 2). The gain in disease-free

1  
2  
3 life expectancy thus exceeded the increase in life expectancy. In the Gaza Strip, the gain of  
4  
5 0.7 years in life expectancy among 20-year-old women was evenly distributed, with 0.5 years  
6  
7 without disease and 0.2 years with disease (table 2). For Palestinian women between ages of  
8  
9 20 and 60, expected years with chronic disease decreased from 10.6 to 9.1 during the period  
10  
11 of 2006-2010 (table 2). The general gain in disease-free life expectancy did not, however,  
12  
13 favour elderly Palestinian women. Thus, among 60-year-old women, expected lifetime with  
14  
15 chronic disease increased by 0.8 years (table 2).  
16  
17  
18  
19  
20  
21  
22  
23  
24  
25  
26  
27  
28  
29  
30  
31  
32  
33  
34  
35  
36  
37  
38  
39  
40  
41  
42  
43  
44  
45  
46  
47  
48  
49  
50  
51  
52  
53  
54  
55  
56  
57  
58  
59  
60

**Table 2 Life expectancy at age 20 and 60, partial life expectancy (age 20–60), and expected lifetime without and with chronic disease, and proportion of expected lifetime without chronic disease – Women, Palestine, 2006 and 2010**

|                                                      | Calendar year | Life expectancy years | Expected lifetime without chronic disease years (95% CI) | Expected lifetime with chronic disease years (95% CI) | Proportion of expected lifetime without chronic disease % (95% CI) |
|------------------------------------------------------|---------------|-----------------------|----------------------------------------------------------|-------------------------------------------------------|--------------------------------------------------------------------|
| <b>20-year-old women</b>                             |               |                       |                                                          |                                                       |                                                                    |
| Gaza Strip                                           | 2006          | 54.5                  | 34.4 (33.3 to 35.5)                                      | 20.1 (19.0 to 21.2)                                   | 63.1 (61.1 to 65.2)                                                |
|                                                      | 2010          | 55.2                  | 34.9 (34.2 to 35.7)                                      | 20.3 (19.5 to 21.0)                                   | 63.2 (61.9 to 64.6)                                                |
| West Bank                                            | 2006          | 55.4                  | 31.6 (30.8 to 32.4)                                      | 23.8 (23.0 to 24.6)                                   | 57.1 (55.6 to 58.5)                                                |
|                                                      | 2010          | 56.0                  | 33.2 (32.7 to 33.7)                                      | 22.8 (22.2 to 23.3)                                   | 59.3 (58.4 to 60.2)                                                |
| Palestinian Territory                                | 2006          | 55.1                  | 32.5 (31.9 to 33.2)                                      | 22.5 (21.9 to 23.2)                                   | 59.1 (57.9 to 60.2)                                                |
|                                                      | 2010          | 55.7                  | 33.8 (33.3 to 34.2)                                      | 21.9 (21.5 to 22.4)                                   | 60.6 (59.9 to 61.4)                                                |
| <b>60-year-old women</b>                             |               |                       |                                                          |                                                       |                                                                    |
| Gaza Strip                                           | 2006          | 18.5                  | 5.7 (4.7 to 6.6)                                         | 12.8 (11.8 to 13.8)                                   | 30.6 (25.3 to 35.9)                                                |
|                                                      | 2010          | 18.8                  | 5.2 (4.6 to 5.9)                                         | 13.6 (12.9 to 14.2)                                   | 27.9 (24.4 to 31.4)                                                |
| West Bank                                            | 2006          | 18.9                  | 5.0 (4.3 to 5.6)                                         | 13.9 (13.3 to 14.6)                                   | 26.3 (22.9 to 29.7)                                                |
|                                                      | 2010          | 19.2                  | 4.4 (4.0 to 4.8)                                         | 14.8 (14.3 to 15.2)                                   | 22.9 (20.7 to 25.2)                                                |
| Palestinian Territory                                | 2006          | 18.8                  | 5.2 (4.6 to 5.7)                                         | 13.6 (13.0 to 14.1)                                   | 27.6 (24.7 to 30.5)                                                |
|                                                      | 2010          | 19.0                  | 4.7 (4.3 to 5.0)                                         | 14.4 (14.0 to 14.7)                                   | 24.5 (22.6 to 26.4)                                                |
| <b>Partial life expectancy between age 20 and 60</b> |               |                       |                                                          |                                                       |                                                                    |
| <b>20 year-old women</b>                             |               |                       |                                                          |                                                       |                                                                    |
| Gaza Strip                                           | 2006          | 38.4                  | 29.5 (28.8 to 30.2)                                      | 8.9 (8.2 to 9.7)                                      | 76.7 (74.9 to 78.6)                                                |
|                                                      | 2010          | 38.6                  | 30.3 (29.8 to 30.8)                                      | 8.3 (7.9 to 8.8)                                      | 78.4 (77.2 to 79.6)                                                |
| West Bank                                            | 2006          | 38.7                  | 27.2 (26.7 to 27.7)                                      | 11.5 (10.9 to 12.0)                                   | 70.4 (69.0 to 71.7)                                                |
|                                                      | 2010          | 38.8                  | 29.3 (28.9 to 29.6)                                      | 9.6 (9.2 to 9.9)                                      | 75.4 (74.5 to 76.3)                                                |
| Palestinian Territory                                | 2006          | 38.6                  | 28.0 (27.6 to 28.4)                                      | 10.6 (10.2 to 11.0)                                   | 72.5 (71.4 to 73.6)                                                |
|                                                      | 2010          | 38.7                  | 29.6 (29.3 to 29.9)                                      | 9.1 (8.9 to 9.4)                                      | 76.4 (75.7 to 77.1)                                                |

Figure 2 shows the results of decomposing into mortality and health effects the change over time in disease-free life expectancy at the age of 20. The mortality effect of approximately one fourth of a year was nearly equal for men and women and did not differ between the Gaza Strip and the West Bank. The divergent change from 2006 to 2010 between men and women in expected lifetime without chronic disease thus resulted from the health effect (*i.e.* prevalence of disease increased among men and decreased among women).

**Fig 2 Decomposition into the mortality and health effects of changes between 2006 and 2010 in disease-free life expectancy at age 20 in the occupied Palestinian territory**



In 2010, 20-year-old men and women could expect 3.6 years (95% CI: 3.3 to 3.9) and 3.2 years (95% CI: 3.0 to 3.5) with heart disease respectively. For the three other most prevalent chronic conditions, women could expect a greater number of years with a disease than could men (12.5 versus 7.7 years with hypertension, 8.3 versus 6.7 years with diabetes, and 6.8 versus 3.6 years with rheumatic conditions) (table 3). No gain in disease-free life expectancy was observed for any of the four diseases, with the exception of heart disease among women. In particular, the health status of men worsened, and the gender gap decreased during the period of 2006 to 2010 (table 3, figure 3).

**Table 3 Life expectancy at age 20 and expected lifetime with the four most prevalent diseases – Palestine, 2006 and 2010**

|                          | Calendar year | Life expectancy years | Expected lifetime with      |                         |                               |                                     |
|--------------------------|---------------|-----------------------|-----------------------------|-------------------------|-------------------------------|-------------------------------------|
|                          |               |                       | Hypertension years (95% CI) | Diabetes years (95% CI) | Heart diseases years (95% CI) | Rheumatic conditions years (95% CI) |
| <b>20-year-old men</b>   |               |                       |                             |                         |                               |                                     |
| Gaza Strip               | 2006          | 52.4                  | 6.0 (5.1 to 6.8)            | 4.6 (3.9 to 5.4)        | 2.4 (1.8 to 2.9)              | 2.1 (1.5 to 2.7)                    |
|                          | 2010          | 52.9                  | 7.9 (7.2 to 8.6)            | 6.7 (6.0 to 7.4)        | 3.3 (2.8 to 3.8)              | 3.4 (2.9 to 4.0)                    |
| West Bank                | 2006          | 52.9                  | 5.5 (4.9 to 6.1)            | 5.4 (4.8 to 6.0)        | 2.9 (2.4 to 3.3)              | 2.5 (2.1 to 3.0)                    |
|                          | 2010          | 53.5                  | 7.6 (7.2 to 8.1)            | 6.8 (6.3 to 7.2)        | 3.7 (3.3 to 4.1)              | 3.7 (3.3 to 4.0)                    |
| Palestinian Territory    | 2006          | 52.8                  | 5.7 (5.2 to 6.2)            | 5.1 (4.7 to 5.6)        | 2.7 (2.4 to 3.1)              | 2.4 (2.0 to 2.7)                    |
|                          | 2010          | 53.3                  | 7.7 (7.3 to 8.1)            | 6.7 (6.3 to 7.1)        | 3.6 (3.3 to 3.9)              | 3.6 (3.3 to 3.9)                    |
| <b>20-year-old women</b> |               |                       |                             |                         |                               |                                     |
| Gaza Strip               | 2006          | 54.5                  | 11.8 (10.8 to 12.8)         | 7.9 (7.0 to 8.8)        | 2.4 (1.8 to 3.0)              | 4.1 (3.4 to 4.8)                    |
|                          | 2010          | 55.2                  | 12.5 (11.7 to 13.2)         | 8.1 (7.4 to 8.7)        | 2.7 (2.3 to 3.2)              | 5.0 (4.4 to 5.6)                    |
| West Bank                | 2006          | 55.4                  | 10.9 (10.2 to 11.7)         | 7.5 (6.9 to 8.2)        | 3.5 (3.0 to 4.0)              | 7.6 (7.0 to 8.3)                    |
|                          | 2010          | 56.0                  | 12.4 (11.9 to 13.0)         | 8.4 (7.9 to 8.8)        | 3.5 (3.1 to 3.9)              | 7.8 (7.3 to 8.2)                    |
| Palestinian Territory    | 2006          | 55.1                  | 11.2 (10.6 to 11.8)         | 7.6 (7.1 to 8.1)        | 3.1 (2.7 to 3.5)              | 6.4 (5.9 to 6.9)                    |
|                          | 2010          | 55.7                  | 12.5 (12.0 to 12.9)         | 8.3 (7.9 to 8.7)        | 3.2 (3.0 to 3.5)              | 6.8 (6.5 to 7.2)                    |



Fig 3 Change between 2006 and 2010 in life expectancy and expected lifetime at age 20 with the four most frequent chronic diseases in the occupied Palestinian territories



## Discussion

As in other populations, Palestinian women live longer than Palestinian men and endure a greater number of years with health problems. But Palestinian women's advantage of 2.7 more years of expected lifetime in 2009 is much less than the gender difference in the neighbouring populations. During the last 20 years life expectancy has increased more for Palestinian men than women, but for both genders the increase has generally been slower for Palestinians than for the neighbouring populations (figure 4).

**Fig 4 Life expectancy at age 20 in the occupied Palestinian territory and other Middle East countries**

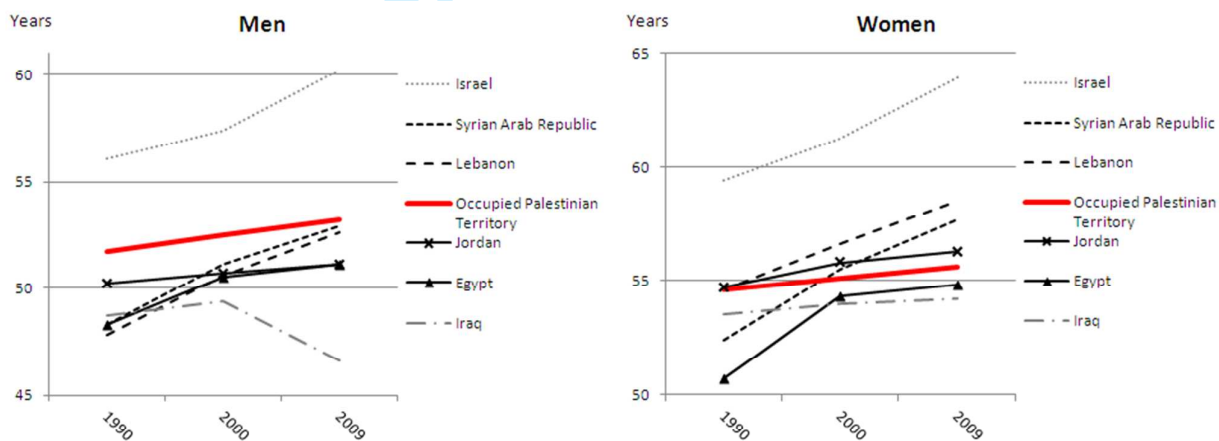

Sources: World Health Organisation, Global Health Observatory Data Repository and Palestinian Central Bureau of Statistics

Remarkably, the changes in partial life expectancy (age interval 20 to 60) without chronic disease from 2006 to 2010 went in opposite directions for men and women. At age 60 lifetime without chronic disease decreased for both sexes, but more among men than women. Health has thus worsened among men, and the gender gap in expected lifetime with chronic disease has narrowed. The changes in health expectancy between 2006 and 2010 were mainly due to the increasing prevalence of chronic disease and not due to increasing life expectancy (figure 2). The gain in life expectancy for men thus consisted not only of additional years with

1  
2  
3 hypertension, diabetes, heart disease, and rheumatic conditions because expected lifetime  
4  
5 without these diseases was shorter in 2010 than in 2006. This tendency toward expansion of  
6  
7 morbidity was less distinct for women.  
8  
9

10  
11 The increase in lifetime with hypertension and diabetes among men is particularly worrisome,  
12  
13 although it might partly reflect trends in ascertainment. Hypertension and diabetes are initial  
14  
15 stages of cardiovascular disease, and the risk is elevated because of the high prevalence of  
16  
17 tobacco smoking among men. The percentage of smoking among men exceeds 40% but is  
18  
19 less than 3% among women.<sup>8 19</sup> The prevalence of smoking is significantly higher in the  
20  
21 West Bank than the Gaza Strip. The percentage of smokers aged 18 and over has declined  
22  
23 from 29.2% in 2000 to 26.9% in 2010 in the West Bank and from 24.1% to 14.6 in the Gaza  
24  
25 Strip.<sup>8</sup> Lung cancer is the most frequent cancer type among Palestinian men.<sup>11</sup> In general,  
26  
27 chronic disease develops gradually, caused by exposure to risk factors such as the effects of  
28  
29 psychological stressors or the long-term cumulative effects of tobacco smoking. Poor  
30  
31 nutrition or undernourishment, in particular in the Gaza Strip and during childhood, increases  
32  
33 the risk of obesity and chronic disease.<sup>11 20-22</sup> Along with tobacco smoking among men, poor  
34  
35 nutrition and physical inactivity are the most important preventable lifestyle-related risk  
36  
37 factors for Palestinians. Prevention related to these risk factors requires particular attention in  
38  
39 order to reduce the incidence of cardiovascular and metabolic disease.  
40  
41  
42  
43  
44  
45  
46

47 Men – particularly young men – face greater exposure to violations by the Israeli army and  
48  
49 Israeli settlers than do women.<sup>23-26</sup> Since 1967, a lot over a quarter of the Palestinians, mostly  
50  
51 young men, have been imprisoned on political grounds and have suffered various health  
52  
53 problems following their release.<sup>27 28</sup> The fluctuations and instability of Palestinians' societal  
54  
55 and political life could affect men and women differently. A survey among young Palestinians  
56  
57  
58  
59  
60

1  
2  
3 in Ramallah showed that exposure to political violence affects the mental health of  
4  
5 adolescents and that depressive-like symptoms were more prevalent among girls than among  
6  
7 boys.<sup>29</sup>  
8  
9

10  
11 Health services and access to diagnosis and treatment are complicated in the West Bank and  
12  
13 the Gaza Strip due to a variety of factors related to restrictions on movement in the West  
14  
15 Bank and the blockade that cuts the Gaza Strip off from the outside world.<sup>5 30</sup> Some of these  
16  
17 deficiencies are, however, partially remedied by humanitarian aid from international bodies.  
18  
19

20  
21 As the character of the abnormal living circumstances differ between the West Bank and the  
22  
23 Gaza Strip, no simple interpretation can be applied to differences between the two territories.  
24

25  
26 The economic hardship can be illustrated by the high unemployment rates. According to the  
27  
28 Palestinian National Authority the unemployment rates in 2011 were 15.9% and 22.6 % for  
29  
30 men and women in the West Bank and 25.8% and 44.0% in the Gaza Strip.<sup>31</sup>  
31  
32

33  
34 In spite of the high number of deaths, attacks on medical personnel and civilians, destruction  
35  
36 of hospitals, *etc.*<sup>32</sup> associated with the Israeli assault on the Gaza Strip shortly before the  
37  
38 second survey in 2010, we cannot expect that this assault would be directly visible in the  
39  
40 health expectancy estimates. The direct effect of Israeli attacks should be assessed by studies  
41  
42 with a more focused design, such as on the impact of the Israeli attack on the Gaza Strip,<sup>32-36</sup>  
43  
44 the Israeli military invasions in the spring of 2002,<sup>29 37</sup> and the army's reaction to the 2000  
45  
46 uprising.<sup>25</sup>  
47  
48

49  
50  
51 In 2009, the *Lancet* published a series of comprehensive studies on the health status of the  
52  
53 population and the health services available in the occupied Palestinian territory, providing  
54  
55 complete information on and evidence of the situation.<sup>5 6 11 30 38</sup> The unsuccessful attempt to  
56  
57  
58  
59  
60

1  
2  
3 establish an efficient health-care system under military occupation has also been examined.<sup>30</sup>  
4  
5 Health status has not improved satisfactorily since the mid-1990s, and the health services  
6  
7 have remained in stasis.<sup>30</sup>  
8  
9

10  
11 Account has been taken of logistical difficulties related to data collection under military  
12  
13 occupation and how this may influence participation and responses by interviewees. The  
14  
15 quality of the survey data is high due to a thoroughly centralised interview training process,  
16  
17 pilot testing, and the quality-control mechanisms applied to data processing. The Palestinian  
18  
19 Central Bureau of Statistics received technical assistance from international organisations  
20  
21 (UNICEF, UN Population Fund, and the Arab League). Furthermore, the standardisation of  
22  
23 questionnaires and sampling methods enables comparisons over time. Study design,  
24  
25 representativeness, non-participation, *etc.* in the Palestinian Family Health Surveys have been  
26  
27 described previously in reports by the Palestinian Central Bureau of Statistics.<sup>8 14</sup>  
28  
29  
30  
31  
32  
33

34 Over half of the Palestinian population is between the ages of 0 and 19, and less than 5% is  
35  
36 over 60 years old. Thus, we did not estimate the widely used disability-free life expectancy  
37  
38 indicator that is typically based on questions related to ageing such as functional disability in  
39  
40 activities of daily living (ADLs) or instrumental activities of daily living (IADLs). The  
41  
42 Minimum European Health Module includes a question on chronic conditions: ‘Do you suffer  
43  
44 from any long-standing illness or condition (health problem)?’<sup>39</sup> Health expectancy estimates  
45  
46 based on this question are available for European countries.<sup>40</sup> Among the 25 EU member  
47  
48 states in 2005 life expectancy at age 65 varied from 12.5 years to 17.7 years for men and from  
49  
50 17.1 years to 22.0 years for women. The average expected lifetime without chronic morbidity  
51  
52 was estimated at 9.6 years for 65-year-old men and 12.4 years for 65-year-old women.<sup>40</sup> In  
53  
54 general life expectancy was lowest in East European countries. While uniformly constructed  
55  
56  
57  
58  
59  
60

1  
2  
3 life tables make international comparisons of life expectancy possible it is a challenge to  
4 compare health expectancies. Due to the lack of international harmonised questionnaires  
5 including chronic disease questions we still need comparable data on health expectancy.  
6  
7  
8  
9  
10 However, figure 5 presents expected lifetime with chronic disease for 65-year-old Estonians,  
11 Hungarians, Latvians, Lithuanians, Slovaks and the whole Europe (EU25) in 2005<sup>40</sup> and  
12 Palestinians in 2006. Because the wording of the questions on chronic diseases in the  
13 Minimum European Health Module and in the Palestinian Family Health Survey 2006 differs  
14 it is unwise to attribute much weight to the comparison of expected lifetime with chronic  
15 disease between the European countries and the occupied Palestinian territory.  
16  
17  
18  
19  
20  
21  
22  
23  
24  
25 There was a striking different gender gap in life expectancy between Europeans and  
26 Palestinians (figure 5). Among 65-year-old Palestinians the women's life expectancy was  
27 only 10% longer than men's whereas the gap in the East European countries varied between  
28 28% and 35%. The average gap in EU25 was 22%. The different gender gap in life  
29 expectancy and health expectancy between the more established EU countries and the newer  
30 EU countries has been discussed previously.<sup>41 42</sup>  
31  
32  
33  
34  
35  
36  
37  
38  
39  
40  
41  
42  
43  
44  
45  
46  
47  
48  
49  
50  
51  
52  
53  
54  
55  
56  
57  
58  
59  
60

**Fig 5 Life expectancy and expected lifetime with chronic disease\*) at age 65 in selected European countries, the whole EU, and the occupied Palestinian territory**

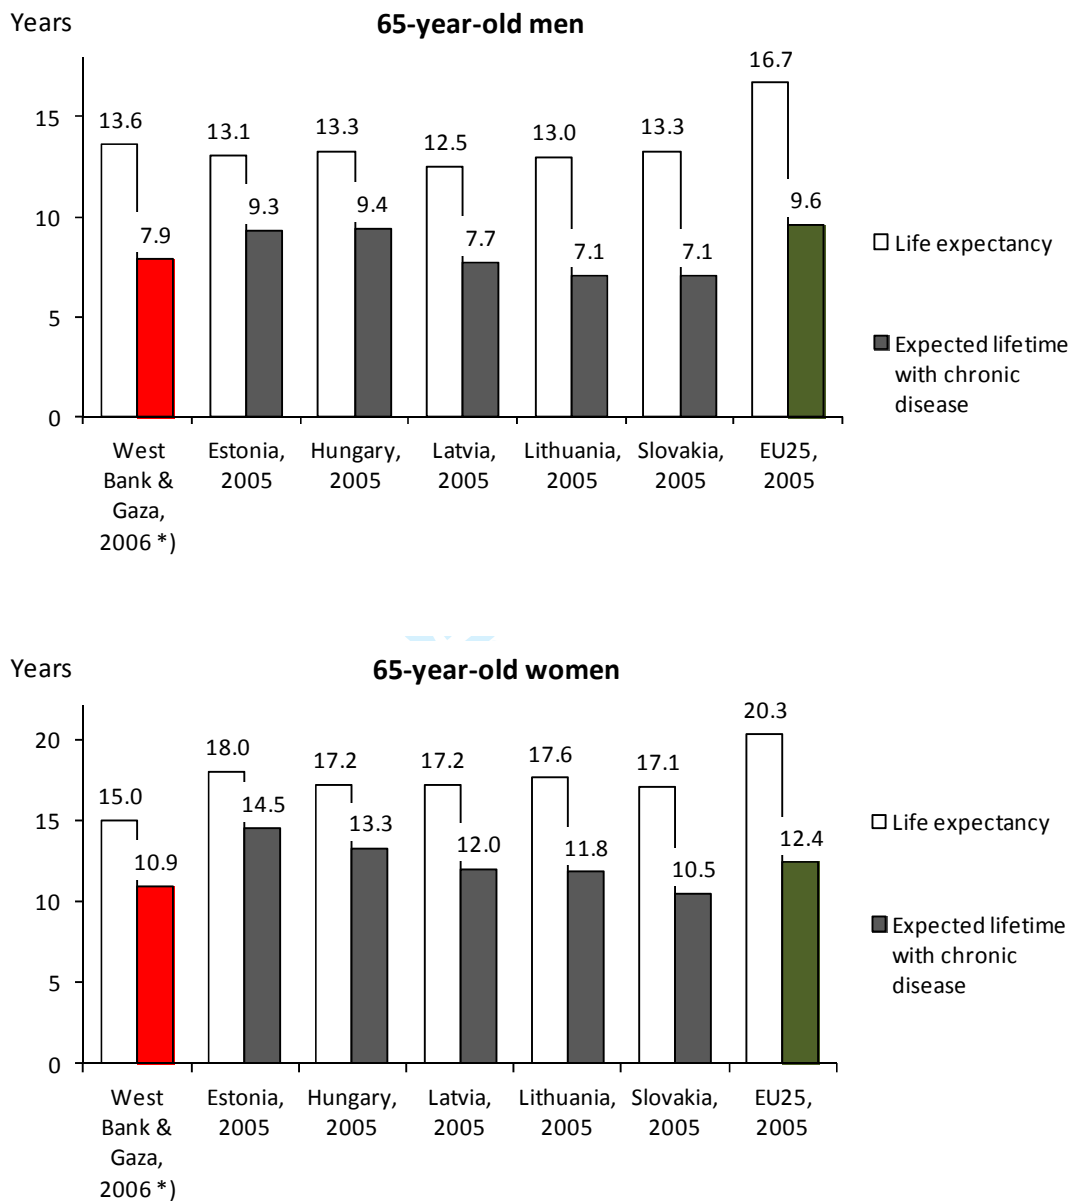

\*) Different questions on chronic diseases in the Minimum European Health Module and the Palestinian Family Health Survey (see text)

1  
2  
3 | Because the study describes health expectancy after the age of 20, less than half of the  
4  
5 population is presented. Demography in the occupied Palestinian territory requires great  
6  
7 attention to the health and welfare of Palestinian children and adolescents.  
8  
9

10  
11 The occupied Palestinian territory is well supplied by data from health surveys, which could  
12  
13 help strengthen the health information system. We recommend that health expectancy be  
14  
15 introduced as a summary measure of population health for monitoring the health status in  
16  
17 Palestine. The data necessary for introducing this indicator is available by conducting  
18  
19 successive uniformly designed health surveys. Coordination with and the simultaneity of the  
20  
21 Pan Arab Project for Family Health furthermore enables future comparisons of health  
22  
23 expectancy between populations in the Arab countries.  
24  
25  
26  
27  
28  
29  
30  
31  
32  
33  
34  
35  
36  
37  
38  
39  
40  
41  
42  
43  
44  
45  
46  
47  
48  
49  
50  
51  
52  
53  
54  
55  
56  
57  
58  
59  
60



**Article summary****Article Focus**

- Health expectancy divides life expectancy into average lifetime in various states of health
- The concept of health expectancy has attracted increased interest among researchers and policymakers as a summary measure of population health and has been estimated in nearly all European countries as well as in many other countries worldwide but has never been estimated for a Middle Eastern population
- The study presents expected lifetime with and without chronic disease as well as what changes have taken place among Palestinians living in the Israeli-occupied Palestinian territory over the past five years

**Key Messages**

- Expected lifetime with the four most prevalent chronic diseases (hypertension, diabetes, heart diseases, and rheumatic conditions) has increased for men. For women, the gain in life expectancy was more evenly distributed as years with and without diseases
- The divergent trends for men and women might be due to different exposures to lifestyle-related risk factors (e.g. smoking) and the impact of military occupation

**Strengths and Limitations**

- The household response rates of the Palestinian Family Health Surveys of 2006 and 2010 were 88.0% and 89.4% and included information on 17 034 and 38 071 adult participants respectively
- In spite of difficulties related to data collection under military occupation representativeness and high quality of the survey data were ensured. International organizations contributed with technical assistance

## References

1. UNRWA Statistics-2010. Selected Indicators. United Nation Relief and Works Agency for Palestine Refugees in the Near East, 2011.  
<http://www.unrwa.org/userfiles/2011120434013.pdf> (accessed September 7, 2012).
2. Statistical yearbook of Palestine 2011. Palestinian National Authority, Palestinian Central Bureau of Statistics. Ramallah, 2011.  
[http://www.pcbs.gov.ps/Portals/\\_PCBS/Downloads/book1814.pdf](http://www.pcbs.gov.ps/Portals/_PCBS/Downloads/book1814.pdf) (accessed September 7, 2012).
3. Special Statistical Bulletin on the 63<sup>rd</sup> anniversary of the Palestinian Nakba. Palestinian Central Bureau of Statistics. Ramallah, 2011.  
[http://www.pcbs.gov.ps/Portals/\\_pcbs/PressRelease/Nakba\\_E63.pdf](http://www.pcbs.gov.ps/Portals/_pcbs/PressRelease/Nakba_E63.pdf) (accessed September 7, 2012).
4. World Bank. Towards a Palestinian State: Reforms for Fiscal Strengthening. World Bank, 2010.  
[http://siteresources.worldbank.org/INTWESTBANKGAZA/Resources/WorldBankReport\\_AHLCApril2010Final.pdf](http://siteresources.worldbank.org/INTWESTBANKGAZA/Resources/WorldBankReport_AHLCApril2010Final.pdf) (accessed September 7, 2012).
5. Giacaman R, Khatib R, Shabaneh L, et al. Health status and health services in the occupied Palestinian territory. *Lancet* 2009;373:837–49.
6. Batniji R, Rabaia Y, Nguyen-Gillham V, et al. Health as human security in the occupied Palestinian territory. *Lancet* 2009;373:1133–43.
7. Rytter MJH, Kjældgaard A-L, Brønnum-Hansen H, et al. Effects of armed conflict on access to emergency health care in Palestinian West Bank: systematic collection of data in emergency departments. *BMJ* 2006;332:1122-4.
8. Palestinian National Authority, Palestinian Central Bureau of Statistics. Palestinian Family Survey, 2010, Main Report, Ramallah, 2011.

- 1  
2  
3 [http://www.pcbs.gov.ps/Portals/\\_PCBS/Downloads/book1821.pdf](http://www.pcbs.gov.ps/Portals/_PCBS/Downloads/book1821.pdf) (accessed September  
4  
5 7, 2012).  
6  
7  
8 9. World Health Organisation, Eastern Mediterranean Regional Office.  
9  
10 <http://rho.emro.who.int/rhodata/?theme=country&vid=21500#> (accessed September 7,  
11  
12 2012).  
13  
14 10. World Health Organisation, Global Health Observatory Data Repository.  
15  
16 <http://apps.who.int/ghodata/?vid=720> (accessed September 7, 2012).  
17  
18 11. Hussein A, Abu-Rmeileh NME, Mikki N, et al. Cardiovascular diseases, diabetes  
19  
20 mellitus, and cancer in the occupied Palestinian territory. *Lancet* 2009;373:1041–9.  
21  
22 12. UNDP International Human Development Indicators <http://hdrstats.undp.org/en/tables>  
23  
24 (accessed September 7, 2012).  
25  
26 13. UN Statistics Division – Demographic and Social Statistics  
27  
28 <http://unstats.un.org/unsd/demographic/products/socind> (accessed September 7, 2012).  
29  
30 14. Palestinian Central Bureau of Statistics. Palestinian Family Health Survey, 2006: Final  
31  
32 report. Ramallah, 2007.  
33  
34 [http://www.pcbs.gov.ps/Portals/\\_PCBS/Downloads/book1416.pdf](http://www.pcbs.gov.ps/Portals/_PCBS/Downloads/book1416.pdf) (accessed September  
35  
36 7, 2012).  
37  
38 15. MORTPAK for Windows. The United Nations Software Package for Demographic  
39  
40 Measurement. Developed by the United Nations Population Division Department of  
41  
42 Economic and Social Affairs.  
43  
44 <http://www.un.org/esa/population/publications/mortpak/MORTPAKwebpage.pdf>  
45  
46 (accessed September 7, 2012).  
47  
48 16. Sullivan DF. A single index of mortality and morbidity. *Health Services and Mental*  
49  
50 *Health Administration (HSMHA)*. *Health Rep* 1971;86:347–54.  
51  
52 17. Jagger C, Cox B, Roy SL, et al. Health expectancy calculation by the Sullivan method: A  
53  
54  
55  
56  
57  
58  
59  
60

- 1  
2  
3 practical guide, 3<sup>rd</sup> Edition. EHEMU Technical report 2006\_3, 2007.  
4  
5 [http://www.eurohex.eu/pdf/Sullivan\\_guide\\_final\\_jun2007.pdf](http://www.eurohex.eu/pdf/Sullivan_guide_final_jun2007.pdf) (accessed September 7,  
6  
7 2012).  
8  
9  
10 18. Nusselder WJ, Looman CW. Decomposition of differences in health expectancy by  
11  
12 cause. *Demography* 2004;41:315–34.  
13  
14 19. Abu-Rmeileh NME, Alderete E, Duque LF, et al. Smoking among adolescents and  
15  
16 teenagers living under conflict: cross-sectional surveys in three settings. *TheLancet.com*  
17  
18 Published online July 5, 2011  
19  
20 <http://download.thelancet.com/flatcontentassets/pdfs/palestine/palestine2011-9.pdf>  
21  
22 (accessed September 7, 2012).  
23  
24  
25 20. Nasser K, Awartani F, Hasan J. Nutritional status in Palestinian schoolchildren living in  
26  
27 West Bank and Gaza Strip: a cross-sectional survey. *TheLancet.com* Published online  
28  
29 July 2, 2010  
30  
31 <http://download.thelancet.com/flatcontentassets/pdfs/palestine/S0140673610608136.pdf>  
32  
33 (accessed September 7, 2012).  
34  
35  
36 21. Mikki N, Abdul-Rahim HF, Awartani F, et al. Prevalence and sociodemographic  
37  
38 correlates of stunting, underweight, and overweight among Palestinian school adolescents  
39  
40 (13-15 years) in two major governorates in the West Bank. *BMC Public Health*  
41  
42 2009;9:485.  
43  
44  
45 22. Mikki N, Abdul-Rahim HF, Shi Z, et al. Dietary habits of Palestinian adolescents in three  
46  
47 major governorates in the West Bank: a cross-sectional survey. *TheLancet.com* Published  
48  
49 online July 2, 2010  
50  
51 <http://download.thelancet.com/flatcontentassets/pdfs/palestine/S0140673610608483.pdf>  
52  
53 (accessed September 7, 2012).  
54  
55  
56 23. Halileh SO. Israeli-Palestinian conflict. Need for medical services for Palestinians injured  
57  
58  
59  
60

- 1  
2  
3 in West Bank is urgent. *BMJ* 2002;324:361.  
4  
5 24. Ferriman A. Palestinian territories face huge burden of disability. *BMJ* 2002;324:320.  
6  
7 25. Helweg-Larsen K, Al-Qadi AH, Al-Jabri J, et al. Systematic medical data collection  
8 of intentional injuries during armed conflicts. a pilot study conducted in West Bank,  
9 Palestine. *Scand J Public Health* 2004;32:17–23.  
10  
11 26. Ghuneim NI, Abed Y. Effects of non-fatal injuries during the war on Gaza Strip on  
12 quality of life: a cross-sectional study. *TheLancet.com* Published online July 2, 2010  
13 <http://download.thelancet.com/flatcontentassets/pdfs/palestine/S0140673610608458.pdf>  
14 (accessed September 7, 2012).  
15  
16 27. Nashif E. Palestinian Political Prisoners: Identity and Community. New York: Routledge,  
17 2008.  
18  
19 28. El Sarraj E, Punamaki RL, Salmi S, et al. Experience of torture and ill-treatment and  
20 posttraumatic stress disorder symptoms among Palestinian political prisoners. *J Trauma*  
21 *Stress* 1996;9:595–606.  
22  
23 29. Giacaman R, Shannon HS, Saab H, et al. Individual and collective exposure to political  
24 violence: Palestinian adolescents coping with conflict. *Eur J Public Health* 2007;17:361–  
25 8.  
26  
27 30. Mataria A, Khatib R, Donaldson C, et al. The health-care system: an assessment and  
28 reform agenda. *Lancet* 2009;373:1207–17.  
29  
30 31. Palestinian National Authority. <http://www.pcbs.gov.ps/site/881/draft.aspx> (accessed  
31 September 7, 2012).  
32  
33 32. Marton R. Human rights violations during Israel's attack on the Gaza Strip: 27 December  
34 2008 to 19 January 2009. *Glob Public Health* 2011;6:560–9.  
35  
36 33. Abu-Rmeileh NME, Hammoudeh W, Giacaman R. Humanitarian crisis and social  
37 suffering in Gaza Strip: an initial analysis of aftermath of latest Israeli war.  
38  
39  
40  
41  
42  
43  
44  
45  
46  
47  
48  
49  
50  
51  
52  
53  
54  
55  
56  
57  
58  
59  
60

- 1  
2  
3 *TheLancet.com* Published online July 2, 2010  
4  
5 <http://download.thelancet.com/flatcontentassets/pdfs/palestine/S014067361060846X.pdf>  
6  
7 (accessed September 7, 2012).  
8  
9  
10 34. Ashour M, Ghuneim N, Yaghi A. Civilians' experience in the Gaza Strip during the  
11 Operation Cast Lead by Israel. *TheLancet.com* Published online July 5, 2011  
12  
13 <http://download.thelancet.com/flatcontentassets/pdfs/palestine/palestine2011-1.pdf>  
14  
15 (accessed September 7, 2012).  
16  
17  
18 35. Ziadni M, Hammoudeh W, Abu-Rmeileh NME, et al. Human insecurity and associated  
19 factors in the Gaza Strip 6 months after 2008-09 Israeli attack: a cross-sectional survey.  
20  
21 *TheLancet.com* Published online July 5, 2011  
22  
23 <http://download.thelancet.com/flatcontentassets/pdfs/palestine/palestine2011-2.pdf>  
24  
25 (accessed September 7, 2012).  
26  
27  
28  
29 36. Abu-Rmeileh NME, Hammoudeh W, Mataria A, et al. Health-related Quality of life of  
30 Gaza Palestinians in the aftermath of the winter 2008–09 Israeli attack on the Strip. *Eur J*  
31  
32 *Public Health* 2011;1-6;[doi:10.1093/eurpub/ckr131](https://doi.org/10.1093/eurpub/ckr131).  
33  
34  
35  
36 37. Giacaman R, Husseini A, Gordon NH, et al. Imprints on the consciousness. The impact  
37 on Palestinian civilians of the Israeli Army invasion of West Bank towns. *Eur J Public*  
38  
39 *Health* 2004;14:286–90.  
40  
41  
42  
43 38. Rahim HFA, Wick L, Halileh S, et al. Maternal and child health in the occupied  
44  
45 Palestinian territory. *Lancet* 2009;373:967–77.  
46  
47  
48 39. Cox B, Van Oyen H, Cambois E, et al. The reliability of the Minimum European Health  
49  
50 Module. *Int J Public Health* 2009;54:55-60.  
51  
52  
53 40. Jagger C, Robine J-M, Van Oyen H, Cambois E. Life Expectancy with Chronic  
54  
55 Morbidity. In *Healthy Life Years in the European Union: Facts and figures 2005*.  
56  
57 Directorate-General for Health & Consumers, European Communities, 2009.  
58  
59  
60

1  
2  
3 [http://ec.europa.eu/health/ph\\_information/reporting/docs/hly\\_en.pdf](http://ec.europa.eu/health/ph_information/reporting/docs/hly_en.pdf) (accessed September  
4  
5 7, 2012).

- 6  
7 41. Nusselder WJ, Looman CWN, Van Oyen H, Robine JM, Jagger C. Gender differences in  
8  
9 health of EU10 and EU15 populations: the double burden of EU men. *Eur J Ageing*  
10  
11 2010;7:219-27.  
12  
13 42. Van Oyen H, Cox B, Jagger C et al. Gender gap in life expectancy and expected years  
14  
15 with activity limitations af age 50 in the European Union: associations with macro-level  
16  
17 structural indicators. *Eur J Ageing* 2010;7:229-37.  
18  
19  
20  
21  
22  
23  
24  
25  
26  
27  
28  
29  
30  
31  
32  
33  
34  
35  
36  
37  
38  
39  
40  
41  
42  
43  
44  
45  
46  
47  
48  
49  
50  
51  
52  
53  
54  
55  
56  
57  
58  
59  
60
